# Supplementary material for: Endophytic l-asparaginase-producing fungi from plants associated with anticancer properties
Source: PubMed Central journal article supplement — J Adv Res. 2014 Aug 7;6(6):869–76. doi: 10.1016/j.jare.2014.07.005 (PMC4642164; doi:10.1016/j.jare.2014.07.005), 2014-08-07
Supplement: mmc1.pdf [file mmc1.pdf]

# Sequence Similarity Blast Search

## 1. PBL2

☰ Descriptions

Sequences producing significant alignments:

Select: [All](#) [None](#) Selected: 0

[Alignments](#)
[Download](#)
[GenBank](#)
[Graphics](#)
[Distance tree of results](#)

| Description                                                                                                                                                                                               | Max score | Total score | Query cover | E value | Ident | Accession                  |
|-----------------------------------------------------------------------------------------------------------------------------------------------------------------------------------------------------------|-----------|-------------|-------------|---------|-------|----------------------------|
| <input type="checkbox"/> <a href="#">Colletotrichum siamense strain CPC 20989 18S ribosomal RNA gene, partial sequence, internal transcribed spacer 1, 5.8S ribosomal RNA gene, and internal tra</a>      | 802       | 802         | 93%         | 0.0     | 99%   | <a href="#">KC566841.1</a> |
| <input type="checkbox"/> <a href="#">Colletotrichum siamense strain CPC 20962 18S ribosomal RNA gene, partial sequence, internal transcribed spacer 1, 5.8S ribosomal RNA gene, and internal tra</a>      | 802       | 802         | 93%         | 0.0     | 99%   | <a href="#">KC566828.1</a> |
| <input type="checkbox"/> <a href="#">Colletotrichum siamense strain IMI 82267 18S ribosomal RNA gene, partial sequence, internal transcribed spacer 1, 5.8S ribosomal RNA gene, and internal tra</a>      | 802       | 802         | 93%         | 0.0     | 99%   | <a href="#">KC566823.1</a> |
| <input type="checkbox"/> <a href="#">Colletotrichum siamense strain CPC 20985 18S ribosomal RNA gene, partial sequence, internal transcribed spacer 1, 5.8S ribosomal RNA gene, and internal tra</a>      | 802       | 802         | 93%         | 0.0     | 99%   | <a href="#">KC566818.1</a> |
| <input type="checkbox"/> <a href="#">Colletotrichum siamense strain CPC 20984 18S ribosomal RNA gene, partial sequence, internal transcribed spacer 1, 5.8S ribosomal RNA gene, and internal tra</a>      | 802       | 802         | 93%         | 0.0     | 99%   | <a href="#">KC566817.1</a> |
| <input type="checkbox"/> <a href="#">Colletotrichum fructicola strain Col 133 18S ribosomal RNA gene, partial sequence, internal transcribed spacer 1, 5.8S ribosomal RNA gene, and internal transcri</a> | 802       | 802         | 93%         | 0.0     | 99%   | <a href="#">KC566774.1</a> |
| <input type="checkbox"/> <a href="#">Colletotrichum gloeosporioides strain HXCG01 18S ribosomal RNA gene, partial sequence, internal transcribed spacer 1, 5.8S ribosomal RNA gene, and intern</a>        | 802       | 802         | 93%         | 0.0     | 99%   | <a href="#">JQ277720.1</a> |
| <input type="checkbox"/> <a href="#">Colletotrichum gloeosporioides strain G15 internal transcribed spacer 1, partial sequence, 5.8S ribosomal RNA gene and internal transcribed spacer 2, comple</a>     | 802       | 802         | 93%         | 0.0     | 99%   | <a href="#">KC958878.1</a> |
| <input type="checkbox"/> <a href="#">Colletotrichum gloeosporioides strain G14 internal transcribed spacer 1, partial sequence, 5.8S ribosomal RNA gene, complete sequence, and internal transcri</a>     | 802       | 802         | 93%         | 0.0     | 99%   | <a href="#">KC958877.1</a> |
| <input type="checkbox"/> <a href="#">Colletotrichum siamense strain F272 18S ribosomal RNA gene, partial sequence, internal transcribed spacer 1, 5.8S ribosomal RNA gene, and internal transcri</a>      | 802       | 802         | 93%         | 0.0     | 99%   | <a href="#">KC425649.1</a> |
| <input type="checkbox"/> <a href="#">Colletotrichum gloeosporioides strain E125 internal transcribed spacer 1, partial sequence, 5.8S ribosomal RNA gene, complete sequence, and internal transcri</a>    | 802       | 802         | 93%         | 0.0     | 99%   | <a href="#">JQ814347.1</a> |
| <input type="checkbox"/> <a href="#">Colletotrichum gloeosporioides strain E128 internal transcribed spacer 1, partial sequence, 5.8S ribosomal RNA gene, complete sequence, and internal transcri</a>    | 802       | 802         | 93%         | 0.0     | 99%   | <a href="#">JQ814348.1</a> |
| <input type="checkbox"/> <a href="#">Colletotrichum gloeosporioides strain E122 internal transcribed spacer 1, partial sequence, 5.8S ribosomal RNA gene, complete sequence, and internal transcri</a>    | 802       | 802         | 93%         | 0.0     | 99%   | <a href="#">JQ814344.1</a> |
| <input type="checkbox"/> <a href="#">Colletotrichum gloeosporioides strain E66.2 internal transcribed spacer 1, partial sequence, 5.8S ribosomal RNA gene, complete sequence, and internal transcri</a>   | 802       | 802         | 93%         | 0.0     | 99%   | <a href="#">JQ814317.1</a> |

## 2. PBL3

☰ Descriptions

Sequences producing significant alignments:

Select: [All](#) [None](#) Selected: 0

[Alignments](#)
[Download](#)
[GenBank](#)
[Graphics](#)
[Distance tree of results](#)

| Description                                                                                                                                                                                      | Max score | Total score | Query cover | E value | Ident | Accession                   |
|--------------------------------------------------------------------------------------------------------------------------------------------------------------------------------------------------|-----------|-------------|-------------|---------|-------|-----------------------------|
| <input type="checkbox"/> <a href="#">Penicillium simplicissimum strain KUC5153 18S ribosomal RNA gene, partial sequence, internal transcribed spacer 1, 5.8S ribosomal RNA gene, and int</a>     | 1068      | 1068        | 100%        | 0.0     | 100%  | <a href="#">HM469430.1</a>  |
| <input type="checkbox"/> <a href="#">Penicillium sp. 6 JJK-2011 18S ribosomal RNA gene, partial sequence, internal transcribed spacer 1, 5.8S ribosomal RNA gene, and internal transcribed s</a> | 1037      | 1037        | 100%        | 0.0     | 99%   | <a href="#">HM469409.1</a>  |
| <input type="checkbox"/> <a href="#">Penicillium sp. UASWS0345 18S ribosomal RNA gene, partial sequence, internal transcribed spacer 1, 5.8S ribosomal RNA gene, and internal transcribe</a>     | 1029      | 1029        | 96%         | 0.0     | 100%  | <a href="#">HM235985.1</a>  |
| <input type="checkbox"/> <a href="#">Fungal sp. JF15 18S ribosomal RNA gene, partial sequence, internal transcribed spacer 1, 5.8S ribosomal RNA gene, and internal transcribed spacer 2, c</a>  | 1024      | 1024        | 100%        | 0.0     | 99%   | <a href="#">KC602324.1</a>  |
| <input type="checkbox"/> <a href="#">Fungal sp. JF11 18S ribosomal RNA gene, partial sequence, internal transcribed spacer 1, 5.8S ribosomal RNA gene, and internal transcribed spacer 2, c</a>  | 1024      | 1024        | 100%        | 0.0     | 99%   | <a href="#">KC602320.1</a>  |
| <input type="checkbox"/> <a href="#">Penicillium simplicissimum isolate ATT160 18S ribosomal RNA gene, partial sequence, internal transcribed spacer 1, 5.8S ribosomal RNA gene, and inte</a>    | 1024      | 1024        | 100%        | 0.0     | 99%   | <a href="#">HQ607866.1</a>  |
| <input type="checkbox"/> <a href="#">Penicillium simplicissimum AHS-257-24 18S ribosomal RNA gene, partial sequence, internal transcribed spacer 1, 5.8S ribosomal RNA gene, and intern</a>      | 1024      | 1024        | 95%         | 0.0     | 100%  | <a href="#">DQ026013.1</a>  |
| <input type="checkbox"/> <a href="#">Penicillium sp. GCA-683-22 18S ribosomal RNA gene, partial sequence, internal transcribed spacer 1, 5.8S ribosomal RNA gene, and internal transcribed</a>   | 1022      | 1022        | 95%         | 0.0     | 100%  | <a href="#">DQ279802.1</a>  |
| <input type="checkbox"/> <a href="#">Penicillium ochrochloron 5.8S rRNA gene, 28S rRNA gene (partial), ITS1 (partial) and ITS2, strain S6A3</a>                                                  | 1016      | 1016        | 100%        | 0.0     | 98%   | <a href="#">AJ509865.1</a>  |
| <input type="checkbox"/> <a href="#">Penicillium simplicissimum isolate P25 18S ribosomal RNA gene, partial sequence, internal transcribed spacer 1, 5.8S ribosomal RNA gene, and interna</a>    | 1013      | 1013        | 100%        | 0.0     | 98%   | <a href="#">JN246043.1</a>  |
| <input type="checkbox"/> <a href="#">Penicillium simplicissimum isolate CY160 18S ribosomal RNA gene, partial sequence, internal transcribed spacer 1, 5.8S ribosomal RNA gene, and inter</a>    | 1013      | 1013        | 100%        | 0.0     | 98%   | <a href="#">HQ607998.1</a>  |
| <input type="checkbox"/> <a href="#">Fungal sp. JF35 18S ribosomal RNA gene, partial sequence, internal transcribed spacer 1, 5.8S ribosomal RNA gene, and internal transcribed spacer 2, c</a>  | 1011      | 1011        | 100%        | 0.0     | 98%   | <a href="#">KC602344.1</a>  |
| <input type="checkbox"/> <a href="#">Uncultured fungus clone z-26 18S ribosomal RNA gene, partial sequence, internal transcribed spacer 1, 5.8S ribosomal RNA gene, and internal transcribe</a>  | 1011      | 1011        | 100%        | 0.0     | 98%   | <a href="#">JN713911.1</a>  |
| <input type="checkbox"/> <a href="#">Penicillium sp. P41 18S ribosomal RNA gene, partial sequence, internal transcribed spacer 1, 5.8S ribosomal RNA gene, and internal transcribed spacer;</a>  | 1011      | 1011        | 100%        | 0.0     | 98%   | <a href="#">JN246045.1</a>  |
| <input type="checkbox"/> <a href="#">Penicillium sp. P17 18S ribosomal RNA gene, partial sequence, internal transcribed spacer 1, 5.8S ribosomal RNA gene, and internal transcribed spacer;</a>  | 1011      | 1011        | 100%        | 0.0     | 98%   | <a href="#">JN246044.1</a>  |
| <input type="checkbox"/> <a href="#">Penicillium wotrol CBS 118171 ITS region, from TYPE material</a>                                                                                            | 1011      | 1011        | 94%         | 0.0     | 100%  | <a href="#">NR_119813.1</a> |
| <input type="checkbox"/> <a href="#">Penicillium sp. 1 JH-2010 culture-collection CBS 116295 internal transcribed spacer 1, 5.8S ribosomal RNA gene, and internal transcribed spacer 2, com</a>  | 1011      | 1011        | 94%         | 0.0     | 100%  | <a href="#">GU981589.1</a>  |

### 3. PBS1

Select: [All](#) [None](#) Selected: 0

Alignments [Download](#) [GenBank](#) [Graphics](#) [Distance tree of results](#)

| Description                                                                                                                                                                                                      | Max score | Total score | Query cover | E value | Ident | Accession                  |
|------------------------------------------------------------------------------------------------------------------------------------------------------------------------------------------------------------------|-----------|-------------|-------------|---------|-------|----------------------------|
| <a href="#">Dolthideomycetes sp. P15E6 18S ribosomal RNA gene, partial sequence, internal transcribed spacer 1, 5.8S ribosomal RNA gene, and internal transcribed spacer 2, complete sequence</a>                | 857       | 857         | 100%        | 0.0     | 99%   | <a href="#">JN207291.1</a> |
| <a href="#">Dolthideomycetes sp. P15E2 18S ribosomal RNA gene, partial sequence, internal transcribed spacer 1, 5.8S ribosomal RNA gene, and internal transcribed spacer 2, complete sequence</a>                | 841       | 841         | 97%         | 0.0     | 99%   | <a href="#">JN207287.1</a> |
| <a href="#">Dolthideomycetes sp. P9E3 18S ribosomal RNA gene, partial sequence, internal transcribed spacer 1, 5.8S ribosomal RNA gene, and internal transcribed spacer 2, complete sequence</a>                 | 839       | 839         | 97%         | 0.0     | 99%   | <a href="#">JN207264.1</a> |
| <a href="#">Dolthideomycetes sp. P15E5 18S ribosomal RNA gene, partial sequence, internal transcribed spacer 1, 5.8S ribosomal RNA gene, and internal transcribed spacer 2, complete sequence</a>                | 837       | 837         | 97%         | 0.0     | 99%   | <a href="#">JN207290.1</a> |
| <a href="#">Dolthideomycete sp. 7696 18S ribosomal RNA gene, partial sequence, internal transcribed spacer 1, 5.8S ribosomal RNA gene, and internal transcribed spacer 2, complete sequence</a>                  | 832       | 832         | 100%        | 0.0     | 98%   | <a href="#">EU680549.1</a> |
| <a href="#">Epilicoccum sorghi isolate NLF01 18S ribosomal RNA gene, partial sequence, internal transcribed spacer 1, 5.8S ribosomal RNA gene, and internal transcribed spacer 2, complete sequence</a>          | 830       | 830         | 99%         | 0.0     | 98%   | <a href="#">KC106688.1</a> |
| <a href="#">Epilicoccum sorghi isolate NLF08 18S ribosomal RNA gene, partial sequence, internal transcribed spacer 1, 5.8S ribosomal RNA gene, and internal transcribed spacer 2, complete sequence</a>          | 830       | 830         | 99%         | 0.0     | 98%   | <a href="#">KC106689.1</a> |
| <a href="#">Dolthideomycete sp. 7687 18S ribosomal RNA gene, partial sequence, internal transcribed spacer 1, 5.8S ribosomal RNA gene, and internal transcribed spacer 2, complete sequence</a>                  | 830       | 830         | 99%         | 0.0     | 98%   | <a href="#">EU680531.1</a> |
| <a href="#">Ascomycete sp. RM6-1 18S ribosomal RNA gene, partial sequence, internal transcribed spacer 1, 5.8S ribosomal RNA gene, and internal transcribed spacer 2, complete sequence</a>                      | 830       | 830         | 99%         | 0.0     | 98%   | <a href="#">DQ993634.1</a> |
| <a href="#">Phoma sp. KGM01 internal transcribed spacer 1, partial sequence, 5.8S ribosomal RNA gene and internal transcribed spacer 2, complete sequence, and 28S rDNA, partial sequence</a>                    | 826       | 826         | 100%        | 0.0     | 96%   | <a href="#">KF675768.1</a> |
| <a href="#">Phoma sp. qenotype 527 isolate NC0343 internal transcribed spacer 1, partial sequence, 5.8S ribosomal RNA gene and internal transcribed spacer 2, complete sequence</a>                              | 826       | 826         | 100%        | 0.0     | 98%   | <a href="#">JQ761375.1</a> |
| <a href="#">Phoma sp. 3 TMS-2011 voucher SC14d1p16-14 18S ribosomal RNA gene, partial sequence, internal transcribed spacer 1, 5.8S ribosomal RNA gene, and internal transcribed spacer 2, complete sequence</a> | 826       | 826         | 100%        | 0.0     | 98%   | <a href="#">HQ651000.1</a> |
| <a href="#">Funqal sp. S4 ZLY-2010 18S ribosomal RNA gene, partial sequence, internal transcribed spacer 1, 5.8S ribosomal RNA gene, and internal transcribed spacer 2, complete sequence</a>                    | 826       | 826         | 100%        | 0.0     | 98%   | <a href="#">GU903284.1</a> |
| <a href="#">Uncultured ascomycete clone 4M1 C07 18S ribosomal RNA gene, partial sequence, internal transcribed spacer 1, 5.8S ribosomal RNA gene, and internal transcribed spacer 2, complete sequence</a>       | 826       | 826         | 100%        | 0.0     | 98%   | <a href="#">EU489900.1</a> |
| <a href="#">Dolthideomycete sp. 7695 18S ribosomal RNA gene, partial sequence, internal transcribed spacer 1, 5.8S ribosomal RNA gene, and internal transcribed spacer 2, complete sequence</a>                  | 826       | 826         | 100%        | 0.0     | 98%   | <a href="#">EU680546.1</a> |
| <a href="#">Dolthideomycetes sp. 7401 18S ribosomal RNA gene, partial sequence, internal transcribed spacer 1, 5.8S ribosomal RNA gene, and internal transcribed spacer 2, complete sequence</a>                 | 826       | 826         | 100%        | 0.0     | 98%   | <a href="#">EU680511.1</a> |
| <a href="#">Dolthideomycete sp. 7400 18S ribosomal RNA gene, partial sequence, internal transcribed spacer 1, 5.8S ribosomal RNA gene, and internal transcribed spacer 2, complete sequence</a>                  | 826       | 826         | 100%        | 0.0     | 98%   | <a href="#">EU680510.1</a> |
| <a href="#">Dolthideomycete sp. 7399 18S ribosomal RNA gene, partial sequence, internal transcribed spacer 1, 5.8S ribosomal RNA gene, and internal transcribed spacer 2, complete sequence</a>                  | 826       | 826         | 100%        | 0.0     | 98%   | <a href="#">EU680509.1</a> |
| <a href="#">Uncultured Dolthideomycetes clone F6 18S ribosomal RNA gene, partial sequence, internal transcribed spacer 1, 5.8S ribosomal RNA gene, and internal transcribed spacer 2, complete sequence</a>      | 826       | 826         | 100%        | 0.0     | 96%   | <a href="#">EU680502.1</a> |
| <a href="#">Uncultured Dolthideomycetes clone F6 18S ribosomal RNA gene, partial sequence, internal transcribed spacer 1, 5.8S ribosomal RNA gene, and internal transcribed spacer 2, complete sequence</a>      | 826       | 826         | 99%         | 0.0     | 98%   | <a href="#">EU680489.1</a> |
| <a href="#">Leptosphaeria saechari isolate PL6FUN29 18S ribosomal RNA gene, partial sequence, internal transcribed spacer 1, 5.8S ribosomal RNA gene, and internal transcribed spacer 2, complete sequence</a>   | 824       | 824         | 99%         | 0.0     | 98%   | <a href="#">KC005680.1</a> |

### 4. PBL4

**Descriptions**

Sequences producing significant alignments:

Select: [All](#) [None](#) Selected: 0

Alignments [Download](#) [GenBank](#) [Graphics](#) [Distance tree of results](#)

| Description                                                                                                                                                                                                              | Max score | Total score | Query cover | E value | Ident | Accession                  |
|--------------------------------------------------------------------------------------------------------------------------------------------------------------------------------------------------------------------------|-----------|-------------|-------------|---------|-------|----------------------------|
| <a href="#">Colletotrichum gloeosporioides strain CG03 18S ribosomal RNA gene, partial sequence, internal transcribed spacer 1, 5.8S ribosomal RNA gene, and internal transcribed spacer 2, complete sequence</a>        | 837       | 837         | 99%         | 0.0     | 99%   | <a href="#">KJ632401.1</a> |
| <a href="#">Colletotrichum gloeosporioides internal transcribed spacer 1, partial sequence, 5.8S ribosomal RNA gene and internal transcribed spacer 2, complete sequence</a>                                             | 837       | 837         | 99%         | 0.0     | 99%   | <a href="#">KJ625631.1</a> |
| <a href="#">Colletotrichum gloeosporioides strain NF68 18S ribosomal RNA gene, partial sequence, internal transcribed spacer 1, 5.8S ribosomal RNA gene, and internal transcribed spacer 2, complete sequence</a>        | 837       | 837         | 99%         | 0.0     | 99%   | <a href="#">KJ588251.1</a> |
| <a href="#">Colletotrichum gloeosporioides strain NF52 18S ribosomal RNA gene, partial sequence, internal transcribed spacer 1, 5.8S ribosomal RNA gene, and internal transcribed spacer 2, complete sequence</a>        | 837       | 837         | 99%         | 0.0     | 99%   | <a href="#">KJ588250.1</a> |
| <a href="#">Colletotrichum gloeosporioides strain NF31 18S ribosomal RNA gene, partial sequence, internal transcribed spacer 1, 5.8S ribosomal RNA gene, and internal transcribed spacer 2, complete sequence</a>        | 837       | 837         | 99%         | 0.0     | 99%   | <a href="#">KJ588249.1</a> |
| <a href="#">Colletotrichum gloeosporioides strain NF25 18S ribosomal RNA gene, partial sequence, internal transcribed spacer 1, 5.8S ribosomal RNA gene, and internal transcribed spacer 2, complete sequence</a>        | 837       | 837         | 99%         | 0.0     | 99%   | <a href="#">KJ588248.1</a> |
| <a href="#">Colletotrichum gloeosporioides strain NF21 18S ribosomal RNA gene, partial sequence, internal transcribed spacer 1, 5.8S ribosomal RNA gene, and internal transcribed spacer 2, complete sequence</a>        | 837       | 837         | 99%         | 0.0     | 99%   | <a href="#">KJ588247.1</a> |
| <a href="#">Colletotrichum sp. 2 MJ-2014 internal transcribed spacer 1, partial sequence, 5.8S ribosomal RNA gene and internal transcribed spacer 2, complete sequence, and 28S rDNA, partial sequence</a>               | 837       | 837         | 99%         | 0.0     | 99%   | <a href="#">KJ572160.1</a> |
| <a href="#">Colletotrichum gloeosporioides voucher SOLS-FT010 18S ribosomal RNA gene, partial sequence, internal transcribed spacer 1, 5.8S ribosomal RNA gene, and internal transcribed spacer 2, complete sequence</a> | 837       | 837         | 99%         | 0.0     | 99%   | <a href="#">KJ493226.1</a> |
| <a href="#">Colletotrichum sp. GM151 18S ribosomal RNA gene, partial sequence, internal transcribed spacer 1, 5.8S ribosomal RNA gene, and internal transcribed spacer 2, complete sequence</a>                          | 837       | 837         | 99%         | 0.0     | 99%   | <a href="#">KF214634.1</a> |
| <a href="#">Colletotrichum sp. ATL-4 internal transcribed spacer 1, partial sequence, 5.8S ribosomal RNA gene and internal transcribed spacer 2, complete sequence, and 28S rDNA, partial sequence</a>                   | 837       | 837         | 99%         | 0.0     | 99%   | <a href="#">KJ160499.1</a> |
| <a href="#">Colletotrichum gloeosporioides isolate UOM U internal transcribed spacer 1, partial sequence, 5.8S ribosomal RNA gene and internal transcribed spacer 2, complete sequence</a>                               | 837       | 837         | 99%         | 0.0     | 99%   | <a href="#">KF923860.1</a> |
| <a href="#">Glomerella cinctulata isolate UOM P internal transcribed spacer 1, partial sequence, 5.8S ribosomal RNA gene and internal transcribed spacer 2, complete sequence</a>                                        | 837       | 997         | 99%         | 0.0     | 99%   | <a href="#">KF923855.1</a> |
| <a href="#">Colletotrichum gloeosporioides isolate UOM N internal transcribed spacer 1, partial sequence, 5.8S ribosomal RNA gene and internal transcribed spacer 2, complete sequence</a>                               | 837       | 837         | 99%         | 0.0     | 99%   | <a href="#">KF923853.1</a> |
| <a href="#">Colletotrichum siamense isolate GM29 18S ribosomal RNA gene, partial sequence, internal transcribed spacer 1, 5.8S ribosomal RNA gene, and internal transcribed spacer 2, complete sequence</a>              | 837       | 837         | 99%         | 0.0     | 99%   | <a href="#">KC512127.1</a> |
| <a href="#">Colletotrichum tropicale isolate GM33-L01 18S ribosomal RNA gene, partial sequence, internal transcribed spacer 1, 5.8S ribosomal RNA gene, and internal transcribed spacer 2, complete sequence</a>         | 837       | 837         | 99%         | 0.0     | 99%   | <a href="#">KC512128.1</a> |
| <a href="#">Colletotrichum gloeosporioides strain F internal transcribed spacer 1, partial sequence, 5.8S ribosomal RNA gene and internal transcribed spacer 2, complete sequence</a>                                    | 837       | 837         | 99%         | 0.0     | 99%   | <a href="#">KF780157.1</a> |

## 5. PBL5

**Descriptions**

Sequences producing significant alignments:

Select: [All](#) [None](#) Selected: 0

[Alignments](#) [Download](#) [GenBank](#) [Graphics](#) [Distance tree of results](#)

| Description                                                                                                                                                                         | Max score | Total score | Query cover | E value | Ident | Accession  |
|-------------------------------------------------------------------------------------------------------------------------------------------------------------------------------------|-----------|-------------|-------------|---------|-------|------------|
| <input type="checkbox"/> Colletotrichum sp. CRPL1 mitochondrial genomic DNA containing 16S-23S intergenic spacer region, isolate CRPL1                                              | 721       | 721         | 100%        | 0.0     | 100%  | HG938365.1 |
| <input type="checkbox"/> Colletotrichum gloeosporioides strain CG60 18S ribosomal RNA gene, partial sequence, internal transcribed spacer 1, 5.8S ribosomal RNA gene, and internal  | 721       | 721         | 100%        | 0.0     | 100%  | KJ632430.1 |
| <input type="checkbox"/> Colletotrichum gloeosporioides strain CG14 18S ribosomal RNA gene, partial sequence, internal transcribed spacer 1, 5.8S ribosomal RNA gene, and internal  | 721       | 721         | 100%        | 0.0     | 100%  | KJ632428.1 |
| <input type="checkbox"/> Colletotrichum gloeosporioides strain CG40 18S ribosomal RNA gene, partial sequence, internal transcribed spacer 1, 5.8S ribosomal RNA gene, and internal  | 721       | 721         | 100%        | 0.0     | 100%  | KJ632416.1 |
| <input type="checkbox"/> Colletotrichum gloeosporioides strain CG04 18S ribosomal RNA gene, partial sequence, internal transcribed spacer 1, 5.8S ribosomal RNA gene, and internal  | 721       | 721         | 100%        | 0.0     | 100%  | KJ632405.1 |
| <input type="checkbox"/> Colletotrichum gloeosporioides strain CG20 18S ribosomal RNA gene, partial sequence, internal transcribed spacer 1, 5.8S ribosomal RNA gene, and internal  | 721       | 721         | 100%        | 0.0     | 100%  | KJ632402.1 |
| <input type="checkbox"/> Colletotrichum gloeosporioides strain CG03 18S ribosomal RNA gene, partial sequence, internal transcribed spacer 1, 5.8S ribosomal RNA gene, and internal  | 721       | 721         | 100%        | 0.0     | 100%  | KJ632401.1 |
| <input type="checkbox"/> Colletotrichum gloeosporioides internal transcribed spacer 1, partial sequence, 5.8S ribosomal RNA gene and internal transcribed spacer 2, complete sequen | 721       | 721         | 100%        | 0.0     | 100%  | KJ625631.1 |
| <input type="checkbox"/> Colletotrichum gloeosporioides strain NF68 18S ribosomal RNA gene, partial sequence, internal transcribed spacer 1, 5.8S ribosomal RNA gene, and internal  | 721       | 721         | 100%        | 0.0     | 100%  | KJ588251.1 |
| <input type="checkbox"/> Colletotrichum gloeosporioides strain NF68 18S ribosomal RNA gene, partial sequence, internal transcribed spacer 1, 5.8S ribosomal RNA gene, and internal  | 721       | 721         | 100%        | 0.0     | 100%  | KJ588250.1 |
| <input type="checkbox"/> Colletotrichum gloeosporioides strain NF21 18S ribosomal RNA gene, partial sequence, internal transcribed spacer 1, 5.8S ribosomal RNA gene, and internal  | 721       | 721         | 100%        | 0.0     | 100%  | KJ588249.1 |
| <input type="checkbox"/> Colletotrichum gloeosporioides strain NF25 18S ribosomal RNA gene, partial sequence, internal transcribed spacer 1, 5.8S ribosomal RNA gene, and internal  | 721       | 721         | 100%        | 0.0     | 100%  | KJ588248.1 |
| <input type="checkbox"/> Colletotrichum gloeosporioides strain NF21 18S ribosomal RNA gene, partial sequence, internal transcribed spacer 1, 5.8S ribosomal RNA gene, and internal  | 721       | 721         | 100%        | 0.0     | 100%  | KJ588247.1 |
| <input type="checkbox"/> Colletotrichum sp. 2 MJ-2014 internal transcribed spacer 1, partial sequence, 5.8S ribosomal RNA gene and internal transcribed spacer 2, complete sequence | 721       | 721         | 100%        | 0.0     | 100%  | KJ572160.1 |
| <input type="checkbox"/> Colletotrichum sp. GM151 18S ribosomal RNA gene, partial sequence, internal transcribed spacer 1, 5.8S ribosomal RNA gene, and internal transcribed spacer | 721       | 721         | 100%        | 0.0     | 100%  | KF214634.1 |
| <input type="checkbox"/> Colletotrichum sp. GM149 18S ribosomal RNA gene, partial sequence, internal transcribed spacer 1, 5.8S ribosomal RNA gene, and internal transcribed spacer | 721       | 721         | 100%        | 0.0     | 100%  | KF214633.1 |
| <input type="checkbox"/> Colletotrichum sp. GM149 18S ribosomal RNA gene, partial sequence, internal transcribed spacer 1, 5.8S ribosomal RNA gene, and internal transcribed spacer | 721       | 721         | 100%        | 0.0     | 100%  | KJ160499.1 |

[//blast.ncbi.nlm.nih.gov/Blast.cgi?aln=Hdr\\_63912688](#)

## 6. PBL6

**Descriptions**

Sequences producing significant alignments:

Select: [All](#) [None](#) Selected: 0

[Alignments](#) [Download](#) [GenBank](#) [Graphics](#) [Distance tree of results](#)

| Description                                                                                                                                                                         | Max score | Total score | Query cover | E value | Ident | Accession  |
|-------------------------------------------------------------------------------------------------------------------------------------------------------------------------------------|-----------|-------------|-------------|---------|-------|------------|
| <input type="checkbox"/> Colletotrichum gloeosporioides strain M32.1 18S ribosomal RNA gene, partial sequence, internal transcribed spacer 1, 5.8S ribosomal RNA gene, and intern   | 785       | 785         | 99%         | 0.0     | 99%   | JQ936116.1 |
| <input type="checkbox"/> Colletotrichum gloeosporioides strain CG30 18S ribosomal RNA gene, partial sequence, internal transcribed spacer 1, 5.8S ribosomal RNA gene, and intern    | 782       | 782         | 99%         | 0.0     | 99%   | KJ632412.1 |
| <input type="checkbox"/> Colletotrichum gloeosporioides strain CG28 18S ribosomal RNA gene, partial sequence, internal transcribed spacer 1, 5.8S ribosomal RNA gene, and intern    | 782       | 782         | 99%         | 0.0     | 99%   | KJ632411.1 |
| <input type="checkbox"/> Colletotrichum gloeosporioides strain CG22 18S ribosomal RNA gene, partial sequence, internal transcribed spacer 1, 5.8S ribosomal RNA gene, and intern    | 782       | 782         | 99%         | 0.0     | 99%   | KJ632410.1 |
| <input type="checkbox"/> Colletotrichum gloeosporioides strain CG16 18S ribosomal RNA gene, partial sequence, internal transcribed spacer 1, 5.8S ribosomal RNA gene, and intern    | 782       | 782         | 99%         | 0.0     | 99%   | KJ632408.1 |
| <input type="checkbox"/> Colletotrichum gloeosporioides isolate MPT-2 18S ribosomal RNA gene, partial sequence, internal transcribed spacer 1, 5.8S ribosomal RNA gene, and inte    | 782       | 782         | 99%         | 0.0     | 99%   | KJ599626.1 |
| <input type="checkbox"/> Colletotrichum gloeosporioides isolate SH14 internal transcribed spacer 1, partial sequence, 5.8S ribosomal RNA gene and internal transcribed spacer 2, co | 782       | 782         | 99%         | 0.0     | 99%   | KJ572157.1 |
| <input type="checkbox"/> Colletotrichum fragariae isolate ZJ23 internal transcribed spacer 1, partial sequence, 5.8S ribosomal RNA gene and internal transcribed spacer 2, complete | 782       | 782         | 99%         | 0.0     | 99%   | KJ572156.1 |
| <input type="checkbox"/> Glomerella cingulata isolate EPOAU010108 internal transcribed spacer 1, partial sequence, 5.8S ribosomal RNA gene and internal transcribed spacer 2, cor   | 782       | 782         | 99%         | 0.0     | 99%   | KJ638946.1 |
| <input type="checkbox"/> Glomerella cingulata isolate EPOAU010107 internal transcribed spacer 1, partial sequence, 5.8S ribosomal RNA gene and internal transcribed spacer 2, cor   | 782       | 782         | 99%         | 0.0     | 99%   | KJ638945.1 |
| <input type="checkbox"/> Glomerella cingulata isolate EPOAU010106 internal transcribed spacer 1, partial sequence, 5.8S ribosomal RNA gene and internal transcribed spacer 2, cor   | 782       | 782         | 99%         | 0.0     | 99%   | KJ638944.1 |
| <input type="checkbox"/> Glomerella cingulata isolate EPOAU010105 internal transcribed spacer 1, partial sequence, 5.8S ribosomal RNA gene and internal transcribed spacer 2, cor   | 782       | 782         | 99%         | 0.0     | 99%   | KJ638943.1 |
| <input type="checkbox"/> Glomerella cingulata isolate EPOAU010104 internal transcribed spacer 1, partial sequence, 5.8S ribosomal RNA gene and internal transcribed spacer 2, cor   | 782       | 782         | 99%         | 0.0     | 99%   | KJ638942.1 |
| <input type="checkbox"/> Glomerella cingulata isolate EPOAU010103 internal transcribed spacer 1, partial sequence, 5.8S ribosomal RNA gene and internal transcribed spacer 2, cor   | 782       | 782         | 99%         | 0.0     | 99%   | KJ638941.1 |
| <input type="checkbox"/> Glomerella cingulata isolate EPOAU010102 internal transcribed spacer 1, partial sequence, 5.8S ribosomal RNA gene and internal transcribed spacer 2, cor   | 782       | 782         | 99%         | 0.0     | 99%   | KJ638940.1 |



## 9. PBL9

**Descriptions**

Sequences producing significant alignments:

Select: [All](#) [None](#) Selected: 0

Alignments [Download](#) [GenBank](#) [Graphics](#) [Distance tree of results](#)

| Description                                                                                                                                                                                | Max score | Total score | Query cover | E value | Ident | Accession                  |
|--------------------------------------------------------------------------------------------------------------------------------------------------------------------------------------------|-----------|-------------|-------------|---------|-------|----------------------------|
| <a href="#">Colletotrichum siamense isolate OCAC22 18S ribosomal RNA gene, partial sequence; internal transcribed spacer 1, 5.8S ribosomal RNA gene, and internal tr</a>                   | 885       | 885         | 100%        | 0.0     | 100%  | <a href="#">KJ813612.1</a> |
| <a href="#">Colletotrichum siamense isolate OCAC19 18S ribosomal RNA gene, partial sequence; internal transcribed spacer 1, 5.8S ribosomal RNA gene, and internal tr</a>                   | 885       | 885         | 100%        | 0.0     | 100%  | <a href="#">KJ813611.1</a> |
| <a href="#">Colletotrichum siamense isolate OCAC3 18S ribosomal RNA gene, partial sequence; internal transcribed spacer 1, 5.8S ribosomal RNA gene, and internal tra</a>                   | 885       | 885         | 100%        | 0.0     | 100%  | <a href="#">KJ813610.1</a> |
| <a href="#">Colletotrichum siamense isolate OCAC14 18S ribosomal RNA gene, partial sequence; internal transcribed spacer 1, 5.8S ribosomal RNA gene, and internal tra</a>                  | 885       | 885         | 100%        | 0.0     | 100%  | <a href="#">KJ813609.1</a> |
| <a href="#">Colletotrichum siamense isolate GM36-L02 18S ribosomal RNA gene, partial sequence; internal transcribed spacer 1, 5.8S ribosomal RNA gene, and internal</a>                    | 885       | 885         | 100%        | 0.0     | 100%  | <a href="#">KC512129.1</a> |
| <a href="#">Colletotrichum siamense isolate GM89-L02 18S rib</a>                                                                                                                           | 885       | 885         | 100%        | 0.0     | 100%  | <a href="#">KC512134.1</a> |
| <a href="#">Colletotrichum tropicale isolate CMM3767 small su</a>                                                                                                                          | 885       | 885         | 100%        | 0.0     | 100%  | <a href="#">KF202985.1</a> |
| <a href="#">Colletotrichum sp. NBL-2013 isolate CMM3794 small subunit ribosomal RNA gene, partial sequence; internal transcribed spacer 1, 5.8S ribosomal RNA gene,</a>                    | 885       | 885         | 100%        | 0.0     | 100%  | <a href="#">KC702976.1</a> |
| <a href="#">Colletotrichum tropicale isolate CMM3783 small subunit ribosomal RNA gene, partial sequence; internal transcribed spacer 1, 5.8S ribosomal RNA gene, and i</a>                 | 885       | 885         | 100%        | 0.0     | 100%  | <a href="#">KC702975.1</a> |
| <a href="#">Colletotrichum sp. NBL-2013 isolate CMM3781 small subunit ribosomal RNA gene, partial sequence; internal transcribed spacer 1, 5.8S ribosomal RNA gene,</a>                    | 885       | 885         | 100%        | 0.0     | 100%  | <a href="#">KC702973.1</a> |
| <a href="#">Colletotrichum tropicale isolate CMM3787 small subunit ribosomal RNA gene, partial sequence; internal transcribed spacer 1, 5.8S ribosomal RNA gene, and i</a>                 | 885       | 885         | 100%        | 0.0     | 100%  | <a href="#">KC702982.1</a> |
| <a href="#">Colletotrichum tropicale isolate CMM3794 small subunit ribosomal RNA gene, partial sequence; internal transcribed spacer 1, 5.8S ribosomal RNA gene, and i</a>                 | 885       | 885         | 100%        | 0.0     | 100%  | <a href="#">KC702965.1</a> |
| <a href="#">Colletotrichum cf. siamense BDS-2013 strain GN01 18S ribosomal RNA gene, partial sequence; internal transcribed spacer 1, 5.8S ribosomal RNA gene, and</a>                     | 885       | 885         | 100%        | 0.0     | 100%  | <a href="#">KC790974.1</a> |
| <a href="#">Colletotrichum siamense strain LC0034 18S ribosomal RNA gene, partial sequence; internal transcribed spacer 1, 5.8S ribosomal RNA gene, and internal tran</a>                  | 885       | 885         | 100%        | 0.0     | 100%  | <a href="#">KC790964.1</a> |
| <a href="#">Colletotrichum siamense isolate COF005 internal transcribed spacer 1, partial sequence; 5.8S ribosomal RNA gene, complete sequence; and internal transcri</a>                  | 885       | 885         | 100%        | 0.0     | 100%  | <a href="#">KF242101.1</a> |
| <a href="#">Colletotrichum siamense isolate DNC059b internal transcribed spacer 1, partial sequence; 5.8S ribosomal RNA gene, complete sequence; and internal transcri</a>                 | 885       | 885         | 100%        | 0.0     | 100%  | <a href="#">KF242102.1</a> |
| <a href="#">Colletotrichum siamense isolate GM36-L02 18S ribosomal RNA gene, partial sequence; internal transcribed spacer 1, 5.8S ribosomal RNA gene, and internal transcribed spacer</a> | 885       | 885         | 100%        | 0.0     | 100%  | <a href="#">JQ89485.1</a>  |

blast.ncbi.nlm.nih.gov/Blast.cgi#alnHdr\_57790089

## 10. PBL10

**Descriptions**

Sequences producing significant alignments:

Select: [All](#) [None](#) Selected: 0

Alignments [Download](#) [GenBank](#) [Graphics](#) [Distance tree of results](#)

| Description                                                                                                                                                              | Max score | Total score | Query cover | E value | Ident | Accession                  |
|--------------------------------------------------------------------------------------------------------------------------------------------------------------------------|-----------|-------------|-------------|---------|-------|----------------------------|
| <a href="#">Colletotrichum sp. CRPL1 mitochondrial genomic DNA containing 16S-23S intergenic spacer region, isolate CRPL1</a>                                            | 815       | 815         | 99%         | 0.0     | 99%   | <a href="#">HG938365.1</a> |
| <a href="#">Colletotrichum gloeosporioides strain CG60 18S ribosomal RNA gene, partial sequence; internal transcribed spacer 1, 5.8S ribosomal RNA gene, and interr</a>  | 815       | 815         | 99%         | 0.0     | 99%   | <a href="#">KJ632430.1</a> |
| <a href="#">Colletotrichum gloeosporioides strain CG14 18S ribosomal RNA gene, partial sequence; internal transcribed spacer 1, 5.8S ribosomal RNA gene, and interr</a>  | 815       | 815         | 99%         | 0.0     | 99%   | <a href="#">KJ632428.1</a> |
| <a href="#">Colletotrichum gloeosporioides strain CG40 18S ribosomal RNA gene, partial sequence; internal transcribed spacer 1, 5.8S ribosomal RNA gene, and interr</a>  | 815       | 815         | 99%         | 0.0     | 99%   | <a href="#">KJ632415.1</a> |
| <a href="#">Colletotrichum gloeosporioides strain CG04 18S ribosomal RNA gene, partial sequence; internal transcribed spacer 1, 5.8S ribosomal RNA gene, and interr</a>  | 815       | 815         | 99%         | 0.0     | 99%   | <a href="#">KJ632405.1</a> |
| <a href="#">Colletotrichum gloeosporioides strain CG20 18S ribosomal RNA gene, partial sequence; internal transcribed spacer 1, 5.8S ribosomal RNA gene, and interr</a>  | 815       | 815         | 99%         | 0.0     | 99%   | <a href="#">KJ632402.1</a> |
| <a href="#">Colletotrichum gloeosporioides strain CG03 18S ribosomal RNA gene, partial sequence; internal transcribed spacer 1, 5.8S ribosomal RNA gene, and interr</a>  | 815       | 815         | 99%         | 0.0     | 99%   | <a href="#">KJ632401.1</a> |
| <a href="#">Colletotrichum gloeosporioides internal transcribed spacer 1, partial sequence; 5.8S ribosomal RNA gene and internal transcribed spacer 2, complete sequ</a> | 815       | 815         | 99%         | 0.0     | 99%   | <a href="#">KJ625631.1</a> |
| <a href="#">Colletotrichum sp. FN-1-N1-2-3 18S ribosomal RNA gene, partial sequence; internal transcribed spacer 1, 5.8S ribosomal RNA gene, and internal transcribe</a> | 815       | 815         | 99%         | 0.0     | 99%   | <a href="#">KJ525669.1</a> |
| <a href="#">Colletotrichum gloeosporioides strain NF68 18S ribosomal RNA gene, partial sequence; internal transcribed spacer 1, 5.8S ribosomal RNA gene, and intern</a>  | 815       | 815         | 99%         | 0.0     | 99%   | <a href="#">KJ588251.1</a> |
| <a href="#">Colletotrichum gloeosporioides strain NF52 18S ribosomal RNA gene, partial sequence; internal transcribed spacer 1, 5.8S ribosomal RNA gene, and intern</a>  | 815       | 815         | 99%         | 0.0     | 99%   | <a href="#">KJ588250.1</a> |
| <a href="#">Colletotrichum gloeosporioides strain NF31 18S ribosomal RNA gene, partial sequence; internal transcribed spacer 1, 5.8S ribosomal RNA gene, and intern</a>  | 815       | 815         | 99%         | 0.0     | 99%   | <a href="#">KJ588249.1</a> |
| <a href="#">Colletotrichum gloeosporioides strain NF25 18S ribosomal RNA gene, partial sequence; internal transcribed spacer 1, 5.8S ribosomal RNA gene, and intern</a>  | 815       | 815         | 99%         | 0.0     | 99%   | <a href="#">KJ588248.1</a> |
| <a href="#">Colletotrichum gloeosporioides strain NF21 18S ribosomal RNA gene, partial sequence; internal transcribed spacer 1, 5.8S ribosomal RNA gene, and intern</a>  | 815       | 815         | 99%         | 0.0     | 99%   | <a href="#">KJ588247.1</a> |

## 11. PBL11

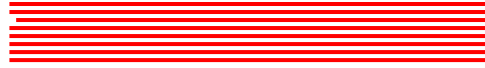

### Descriptions

#### Sequences producing significant alignments:

Select: [All](#) [None](#) Selected:0

Alignments [Download](#) [GenBank](#) [Graphics](#) [Distance tree of results](#)

| Description                                                                                                                                                                                                                                  | Max score | Total score | Query cover | E value | Ident | Accession                  |
|----------------------------------------------------------------------------------------------------------------------------------------------------------------------------------------------------------------------------------------------|-----------|-------------|-------------|---------|-------|----------------------------|
| <a href="#">Fusarium proliferatum strain CE1 18S ribosomal RNA gene, partial sequence, internal transcribed spacer 1, 5.8S ribosomal RNA gene, and internal transcribed spacer 2, complete sequence; and 28S ribosomal RNA gene</a>          | 1026      | 1026        | 100%        | 0.0     | 99%   | <a href="#">KJ576800.1</a> |
| <a href="#">Gibberella intermedia isolate ZA internal transcribed spacer 1, partial sequence, 5.8S ribosomal RNA gene, complete sequence, and internal transcribed spacer 2, complete sequence; and 28S ribosomal RNA gene</a>               | 1026      | 1026        | 100%        | 0.0     | 99%   | <a href="#">JQ690083.1</a> |
| <a href="#">Cytaria darwinii isolate 14 18S small subunit ribosomal RNA gene, partial sequence, internal transcribed spacer 1, 5.8S ribosomal RNA gene, and internal transcribed spacer 2, complete sequence; and 28S ribosomal RNA gene</a> | 1026      | 1026        | 100%        | 0.0     | 99%   | <a href="#">EU107253.1</a> |
| <a href="#">Botryosphaeria dothidea strain sdau08-88 18S ribosomal RNA gene, partial sequence, internal transcribed spacer 1, 5.8S ribosomal RNA gene, and internal transcribed spacer 2, complete sequence; and 28S ribosomal RNA gene</a>  | 1026      | 1026        | 100%        | 0.0     | 99%   | <a href="#">GQ855797.1</a> |
| <a href="#">Fusarium proliferatum 18S ribosomal RNA gene, partial sequence, internal transcribed spacer 1, 5.8S ribosomal RNA gene, and internal transcribed spacer 2, complete sequence; and 28S ribosomal RNA gene</a>                     | 1026      | 1026        | 100%        | 0.0     | 99%   | <a href="#">FJ040179.1</a> |
| <a href="#">Fusarium proliferatum strain D1 18S ribosomal RNA gene, partial sequence, internal transcribed spacer 1, 5.8S ribosomal RNA gene, and internal transcribed spacer 2, complete sequence; and 28S ribosomal RNA gene</a>           | 1026      | 1026        | 100%        | 0.0     | 99%   | <a href="#">EU151484.1</a> |
| <a href="#">Fusarium proliferatum strain CE1 18S ribosomal RNA gene, partial sequence, internal transcribed spacer 1, 5.8S ribosomal RNA gene, and internal transcribed spacer 2, complete sequence; and 28S ribosomal RNA gene</a>          | 1026      | 1026        | 100%        | 0.0     | 99%   | <a href="#">EU151486.1</a> |
| <a href="#">Fusarium sp. CID124 haplotype fus124 18S ribosomal RNA gene, partial sequence, internal transcribed spacer 1, 5.8S ribosomal RNA gene, and internal transcribed spacer 2, complete sequence; and 28S ribosomal RNA gene</a>      | 1026      | 1026        | 100%        | 0.0     | 99%   | <a href="#">EF589878.1</a> |
| <a href="#">Fusarium sp. QJC-1403 18S ribosomal RNA gene, partial sequence, 5.8S ribosomal RNA gene and internal transcribed spacer, complete sequence, and 28S ribosomal RNA gene</a>                                                       | 1024      | 1024        | 99%         | 0.0     | 99%   | <a href="#">EU117221.1</a> |
| <a href="#">Fusarium sp. TF1 18S ribosomal RNA gene, partial sequence, internal transcribed spacer 1, 5.8S ribosomal RNA gene, and internal transcribed spacer 2, complete sequence; and 28S ribosomal RNA gene</a>                          | 1022      | 1022        | 99%         | 0.0     | 99%   | <a href="#">KF511640.1</a> |
| <a href="#">Uncultured Fusarium sp. 18S rRNA gene, 5.8S rRNA gene, ITS1, 26S rRNA gene (partial) and ITS2, clone (57)9</a>                                                                                                                   | 1022      | 1022        | 99%         | 0.0     | 99%   | <a href="#">AM162678.1</a> |
| <a href="#">Fusarium sp. Fs020TNPB1-TR 18S ribosomal RNA gene, partial sequence, internal transcribed spacer 1, 5.8S ribosomal RNA gene, and internal transcribed spacer 2, complete sequence; and 28S ribosomal RNA gene</a>                | 1020      | 1020        | 100%        | 0.0     | 99%   | <a href="#">KF293339.1</a> |
| <a href="#">Fusarium sp. BM3-18S ribosomal RNA gene, partial sequence, internal transcribed spacer 1, 5.8S ribosomal RNA gene, and internal transcribed spacer 2, complete sequence; and 28S ribosomal RNA gene</a>                          | 1020      | 1020        | 100%        | 0.0     | 99%   | <a href="#">KJ567458.1</a> |

## 12. PBL12

### Descriptions

#### Sequences producing significant alignments:

Select: [All](#) [None](#) Selected:0

Alignments [Download](#) [GenBank](#) [Graphics](#) [Distance tree of results](#)

| Description                                                                                                                                                                                                                                         | Max score | Total score | Query cover | E value | Ident | Accession                  |
|-----------------------------------------------------------------------------------------------------------------------------------------------------------------------------------------------------------------------------------------------------|-----------|-------------|-------------|---------|-------|----------------------------|
| <a href="#">Colletotrichum gloeosporioides isolate CgloTIN03 18S ribosomal RNA gene, partial sequence, internal transcribed spacer 1, 5.8S ribosomal RNA gene, and internal transcribed spacer 2, complete sequence; and 28S ribosomal RNA gene</a> | 957       | 957         | 100%        | 0.0     | 99%   | <a href="#">KF053199.1</a> |
| <a href="#">Colletotrichum sp. TN1 18S ribosomal RNA gene, partial sequence, internal transcribed spacer 1, 5.8S ribosomal RNA gene, and internal transcribed spacer 2, complete sequence; and 28S ribosomal RNA gene</a>                           | 957       | 957         | 100%        | 0.0     | 99%   | <a href="#">JF730185.1</a> |
| <a href="#">Colletotrichum gloeosporioides strain HRwh-2 18S ribosomal RNA gene, partial sequence, internal transcribed spacer 1, 5.8S ribosomal RNA gene, and internal transcribed spacer 2, complete sequence; and 28S ribosomal RNA gene</a>     | 957       | 957         | 100%        | 0.0     | 99%   | <a href="#">HQ645073.1</a> |
| <a href="#">Glomerella cingulata gene for 18S rRNA, partial sequence, isolate:MAFF 305913</a>                                                                                                                                                       | 957       | 957         | 100%        | 0.0     | 99%   | <a href="#">AB042315.1</a> |
| <a href="#">Colletotrichum gloeosporioides strain SDAU-08-77 18S ribosomal RNA gene, partial sequence, internal transcribed spacer 1, 5.8S ribosomal RNA gene, and internal transcribed spacer 2, complete sequence; and 28S ribosomal RNA gene</a> | 955       | 955         | 99%         | 0.0     | 99%   | <a href="#">FJ550213.1</a> |
| <a href="#">Glomerella cingulata isolate 17CA1 18S ribosomal RNA gene, internal transcribed spacer 1, 5.8S ribosomal RNA gene, internal transcribed spacer 2, and internal transcribed spacer 3, complete sequence; and 28S ribosomal RNA gene</a>  | 953       | 953         | 99%         | 0.0     | 99%   | <a href="#">GU066611.1</a> |
| <a href="#">Glomerella cingulata isolate 148HUR 18S ribosomal RNA gene, internal transcribed spacer 1, 5.8S ribosomal RNA gene, internal transcribed spacer 2, and internal transcribed spacer 3, complete sequence; and 28S ribosomal RNA gene</a> | 953       | 953         | 99%         | 0.0     | 99%   | <a href="#">GU066703.1</a> |
| <a href="#">Colletotrichum gloeosporioides strain CG14 18S ribosomal RNA gene, partial sequence, internal transcribed spacer 1, 5.8S ribosomal RNA gene, and internal transcribed spacer 2, complete sequence; and 28S ribosomal RNA gene</a>       | 952       | 952         | 100%        | 0.0     | 99%   | <a href="#">KJ632428.1</a> |
| <a href="#">Colletotrichum gloeosporioides strain CG14 18S ribosomal RNA gene, partial sequence, internal transcribed spacer 1, 5.8S ribosomal RNA gene, and internal transcribed spacer 2, complete sequence; and 28S ribosomal RNA gene</a>       | 952       | 952         | 100%        | 0.0     | 99%   | <a href="#">KJ617392.1</a> |
| <a href="#">Colletotrichum gloeosporioides isolate C17 18S ribosomal RNA gene, partial sequence, internal transcribed spacer 1, 5.8S ribosomal RNA gene, and internal transcribed spacer 2, complete sequence; and 28S ribosomal RNA gene</a>       | 952       | 952         | 100%        | 0.0     | 99%   | <a href="#">KC010549.1</a> |
| <a href="#">Colletotrichum gloeosporioides isolate C17 18S ribosomal RNA gene, partial sequence, internal transcribed spacer 1, 5.8S ribosomal RNA gene, and internal transcribed spacer 2, complete sequence; and 28S ribosomal RNA gene</a>       | 952       | 952         | 100%        | 0.0     | 99%   | <a href="#">KC010548.1</a> |
| <a href="#">Colletotrichum gloeosporioides isolate C16 18S ribosomal RNA gene, partial sequence, internal transcribed spacer 1, 5.8S ribosomal RNA gene, and internal transcribed spacer 2, complete sequence; and 28S ribosomal RNA gene</a>       | 952       | 952         | 100%        | 0.0     | 99%   | <a href="#">KC010547.1</a> |
| <a href="#">Glomerella sp. EF10 18S ribosomal RNA gene, partial sequence, internal transcribed spacer 1, 5.8S ribosomal RNA gene, and internal transcribed spacer 2, complete sequence; and 28S ribosomal RNA gene</a>                              | 952       | 952         | 100%        | 0.0     | 99%   | <a href="#">JQ809666.1</a> |
| <a href="#">Colletotrichum gloeosporioides strain CCGHN01 18S ribosomal RNA gene, partial sequence, internal transcribed spacer 1, 5.8S ribosomal RNA gene, and internal transcribed spacer 2, complete sequence; and 28S ribosomal RNA gene</a>    | 952       | 952         | 100%        | 0.0     | 99%   | <a href="#">GQ424105.1</a> |

### 13. PBS3

**Descriptions**

Sequences producing significant alignments:

Select: [All](#) [None](#) Selected:0

Alignments [Download](#) [GenBank](#) [Graphics](#) [Distance tree of results](#)

| Description                                                                                                                                                                                                  | Max score | Total score | Query cover | E value | Ident | Accession                  |
|--------------------------------------------------------------------------------------------------------------------------------------------------------------------------------------------------------------|-----------|-------------|-------------|---------|-------|----------------------------|
| <input type="checkbox"/> <a href="#">Colletotrichum siamense isolate OOC70 18S ribosomal RNA gene, partial sequence, internal transcribed spacer 1, 5.8S ribosomal RNA gene, and internal tra</a>            | 782       | 782         | 100%        | 0.0     | 100%  | <a href="#">KJ486139.1</a> |
| <input type="checkbox"/> <a href="#">Colletotrichum siamense isolate OOC69 18S ribosomal RNA gene, partial sequence, internal transcribed spacer 1, 5.8S ribosomal RNA gene, and internal tra</a>            | 782       | 782         | 100%        | 0.0     | 100%  | <a href="#">KJ486138.1</a> |
| <input type="checkbox"/> <a href="#">Colletotrichum siamense isolate OOC68 18S ribosomal RNA gene, partial sequence, internal transcribed spacer 1, 5.8S ribosomal RNA gene, and internal tra</a>            | 782       | 782         | 100%        | 0.0     | 100%  | <a href="#">KJ486137.1</a> |
| <input type="checkbox"/> <a href="#">Colletotrichum siamense isolate OOC67 18S ribosomal RNA gene, partial sequence, internal transcribed spacer 1, 5.8S ribosomal RNA gene, and internal tra</a>            | 782       | 782         | 100%        | 0.0     | 100%  | <a href="#">KJ486136.1</a> |
| <input checked="" type="checkbox"/> <a href="#">Colletotrichum siamense isolate OOC65 18S ribosomal RNA gene, partial sequence, internal transcribed spacer 1, 5.8S ribosomal RNA gene, and internal tra</a> | 782       | 782         | 100%        | 0.0     | 100%  | <a href="#">KJ486135.1</a> |
| <input type="checkbox"/> <a href="#">Colletotrichum siamense isolate OOC56 18S ribosomal RNA gene, partial sequence, internal transcribed spacer 1, 5.8S ribosomal RNA gene, and internal tra</a>            | 782       | 782         | 100%        | 0.0     | 100%  | <a href="#">KJ486134.1</a> |
| <input type="checkbox"/> <a href="#">Colletotrichum siamense isolate OOC55 18S ribosomal RNA gene, partial sequence, internal transcribed spacer 1, 5.8S ribosomal RNA gene, and internal tra</a>            | 782       | 782         | 100%        | 0.0     | 100%  | <a href="#">KJ486133.1</a> |
| <input type="checkbox"/> <a href="#">Colletotrichum siamense isolate OOC54 18S ribosomal RNA gene, partial sequence, internal transcribed spacer 1, 5.8S ribosomal RNA gene, and internal tra</a>            | 782       | 782         | 100%        | 0.0     | 100%  | <a href="#">KJ486132.1</a> |
| <input type="checkbox"/> <a href="#">Colletotrichum siamense isolate OOC53 18S ribosomal RNA gene, partial sequence, internal transcribed spacer 1, 5.8S ribosomal RNA gene, and internal tra</a>            | 782       | 782         | 100%        | 0.0     | 100%  | <a href="#">KJ486131.1</a> |
| <input type="checkbox"/> <a href="#">Colletotrichum siamense isolate OOC44 18S ribosomal RNA gene, partial sequence, internal transcribed spacer 1, 5.8S ribosomal RNA gene, and internal tra</a>            | 782       | 782         | 100%        | 0.0     | 100%  | <a href="#">KJ486130.1</a> |
| <input type="checkbox"/> <a href="#">Colletotrichum siamense isolate OOC43 18S ribosomal RNA gene, partial sequence, internal transcribed spacer 1, 5.8S ribosomal RNA gene, and internal tra</a>            | 782       | 782         | 100%        | 0.0     | 100%  | <a href="#">KJ486129.1</a> |
| <input type="checkbox"/> <a href="#">Colletotrichum siamense isolate OOC38 18S ribosomal RNA gene, partial sequence, internal transcribed spacer 1, 5.8S ribosomal RNA gene, and internal tra</a>            | 782       | 782         | 100%        | 0.0     | 100%  | <a href="#">KJ486128.1</a> |
| <input type="checkbox"/> <a href="#">Colletotrichum siamense isolate OOC37 18S ribosomal RNA gene, partial sequence, internal transcribed spacer 1, 5.8S ribosomal RNA gene, and internal tra</a>            | 782       | 782         | 100%        | 0.0     | 100%  | <a href="#">KJ486127.1</a> |
| <input type="checkbox"/> <a href="#">Colletotrichum siamense isolate OOC33 18S ribosomal RNA gene, partial sequence, internal transcribed spacer 1, 5.8S ribosomal RNA gene, and internal tra</a>            | 782       | 782         | 100%        | 0.0     | 100%  | <a href="#">KJ486126.1</a> |
| <input type="checkbox"/> <a href="#">Colletotrichum siamense isolate OOC32 18S ribosomal RNA gene, partial sequence, internal transcribed spacer 1, 5.8S ribosomal RNA gene, and internal tra</a>            | 782       | 782         | 100%        | 0.0     | 100%  | <a href="#">KJ486125.1</a> |
| <input type="checkbox"/> <a href="#">Colletotrichum siamense isolate OOC30 18S ribosomal RNA gene, partial sequence, internal transcribed spacer 1, 5.8S ribosomal RNA gene, and internal tra</a>            | 782       | 782         | 100%        | 0.0     | 100%  | <a href="#">KJ486124.1</a> |
| <input type="checkbox"/> <a href="#">Colletotrichum siamense isolate OOC28 18S ribosomal RNA gene, partial sequence, internal transcribed spacer 1, 5.8S ribosomal RNA gene, and internal tra</a>            | 782       | 782         | 100%        | 0.0     | 100%  | <a href="#">KJ486123.1</a> |

### 14. PBL13

**Descriptions**

Sequences producing significant alignments:

Select: [All](#) [None](#) Selected:0

Alignments [Download](#) [GenBank](#) [Graphics](#) [Distance tree of results](#)

| Description                                                                                                                                                                                      | Max score | Total score | Query cover | E value | Ident | Accession                   |
|--------------------------------------------------------------------------------------------------------------------------------------------------------------------------------------------------|-----------|-------------|-------------|---------|-------|-----------------------------|
| <input type="checkbox"/> <a href="#">Penicillium simplicissimum strain KUC5153 18S ribosomal RNA gene, partial sequence, internal transcribed spacer 1, 5.8S ribosomal RNA gene, and int</a>     | 1059      | 1059        | 98%         | 0.0     | 99%   | <a href="#">HM469430.1</a>  |
| <input type="checkbox"/> <a href="#">Penicillium sp. UASWS0345 18S ribosomal RNA gene, partial sequence, internal transcribed spacer 1, 5.8S ribosomal RNA gene, and internal transcriber</a>    | 1029      | 1029        | 94%         | 0.0     | 100%  | <a href="#">HM235985.1</a>  |
| <input type="checkbox"/> <a href="#">Penicillium sp. 6 JJK-2011 18S ribosomal RNA gene, partial sequence, internal transcribed spacer 1, 5.8S ribosomal RNA gene, and internal transcribed ;</a> | 1027      | 1027        | 98%         | 0.0     | 99%   | <a href="#">HM469409.1</a>  |
| <input type="checkbox"/> <a href="#">Penicillium simplicissimum AHS-257-24 18S ribosomal RNA gene, partial sequence, internal transcribed spacer 1, 5.8S ribosomal RNA gene, and intern</a>      | 1024      | 1024        | 94%         | 0.0     | 100%  | <a href="#">DQ026013.1</a>  |
| <input type="checkbox"/> <a href="#">Penicillium sp. GCA-683-22 18S ribosomal RNA gene, partial sequence, internal transcribed spacer 1, 5.8S ribosomal RNA gene, and internal transcribed</a>   | 1022      | 1022        | 93%         | 0.0     | 100%  | <a href="#">DQ279802.1</a>  |
| <input type="checkbox"/> <a href="#">Fungal sp. JF15 18S ribosomal RNA gene, partial sequence, internal transcribed spacer 1, 5.8S ribosomal RNA gene, and internal transcribed spacer 2, c</a>  | 1014      | 1014        | 98%         | 0.0     | 98%   | <a href="#">KC602324.1</a>  |
| <input type="checkbox"/> <a href="#">Penicillium sp. 19DUL 18S ribosomal RNA gene, internal transcribed spacer 1, 5.8S ribosomal RNA gene, internal transcribed spacer 2, and 28S ribosom</a>    | 1013      | 1013        | 98%         | 0.0     | 98%   | <a href="#">GU066613.1</a>  |
| <input type="checkbox"/> <a href="#">Penicillium simplicissimum isolate ATT160 18S ribosomal RNA gene, partial sequence, internal transcribed spacer 1, 5.8S ribosomal RNA gene, and inte</a>    | 1011      | 1011        | 97%         | 0.0     | 98%   | <a href="#">HQ607886.1</a>  |
| <input type="checkbox"/> <a href="#">Penicillium wotroi CBS 118171 ITS region, from TYPE material</a>                                                                                            | 1011      | 1011        | 92%         | 0.0     | 100%  | <a href="#">NR_119813.1</a> |
| <input type="checkbox"/> <a href="#">Penicillium sp. 1 JH-2010 culture-collection CBS:116295 internal transcribed spacer 1, 5.8S ribosomal RNA gene, and internal transcribed spacer 2, comp</a> | 1011      | 1011        | 92%         | 0.0     | 100%  | <a href="#">GU981589.1</a>  |
| <input type="checkbox"/> <a href="#">Fungal sp. JF11 18S ribosomal RNA gene, partial sequence, internal transcribed spacer 1, 5.8S ribosomal RNA gene, and internal transcribed spacer 2, c</a>  | 1009      | 1009        | 98%         | 0.0     | 98%   | <a href="#">KC602320.1</a>  |
| <input type="checkbox"/> <a href="#">Penicillium ochrochloron 5.8S rRNA gene, 28S rRNA gene (partial), ITS1 (partial) and ITS2, strain S6A3</a>                                                  | 1003      | 1003        | 97%         | 0.0     | 98%   | <a href="#">AJ509865.1</a>  |
| <input type="checkbox"/> <a href="#">Fungal sp. JF35 18S ribosomal RNA gene, partial sequence, internal transcribed spacer 1, 5.8S ribosomal RNA gene, and internal transcribed spacer 2, c</a>  | 1002      | 1002        | 98%         | 0.0     | 98%   | <a href="#">KC602344.1</a>  |
| <input type="checkbox"/> <a href="#">Penicillium simplicissimum isolate P25 18S ribosomal RNA gene, partial sequence, internal transcribed spacer 1, 5.8S ribosomal RNA gene, and internal</a>   | 1000      | 1000        | 97%         | 0.0     | 98%   | <a href="#">JN246043.1</a>  |
| <input type="checkbox"/> <a href="#">Penicillium simplicissimum isolate CY160 18S ribosomal RNA gene, partial sequence, internal transcribed spacer 1, 5.8S ribosomal RNA gene, and inter</a>    | 1000      | 1000        | 97%         | 0.0     | 98%   | <a href="#">HQ607998.1</a>  |

## 15. ODL1

### Descriptions

#### Sequences producing significant alignments:

Select: [All](#) [None](#) Selected: 0

Alignments [Download](#) [GenBank](#) [Graphics](#) [Distance tree of results](#)

|                          | Description                                                                                                                                                                                                   | Max score | Total score | Query cover | E value | Ident | Accession                  |
|--------------------------|---------------------------------------------------------------------------------------------------------------------------------------------------------------------------------------------------------------|-----------|-------------|-------------|---------|-------|----------------------------|
| <input type="checkbox"/> | <a href="#">Fusarium sp. Fs025TNW-T 18S ribosomal RNA gene, partial sequence, internal transcribed spacer 1, 5.8S ribosomal RNA gene, and internal transcribed spacer 2, complete sequence</a>                | 688       | 688         | 100%        | 0.0     | 100%  | <a href="#">KF293357.1</a> |
| <input type="checkbox"/> | <a href="#">Fusarium sp. Fs020TNPB1-TR 18S ribosomal RNA gene, partial sequence, internal transcribed spacer 1, 5.8S ribosomal RNA gene, and internal transcribed spacer 2, complete sequence</a>             | 688       | 688         | 100%        | 0.0     | 100%  | <a href="#">KF293339.1</a> |
| <input type="checkbox"/> | <a href="#">Fusarium sp. FsCP21HRW-T internal transcribed spacer 1, partial sequence, 5.8S ribosomal RNA gene and internal transcribed spacer 2, complete sequence</a>                                        | 688       | 688         | 100%        | 0.0     | 100%  | <a href="#">KF293320.1</a> |
| <input type="checkbox"/> | <a href="#">Fusarium verticillioides strain CM12m2 18S ribosomal RNA gene, partial sequence, internal transcribed spacer 1, 5.8S ribosomal RNA gene, and internal transcribed spacer 2, complete sequence</a> | 688       | 688         | 100%        | 0.0     | 100%  | <a href="#">KJ188868.1</a> |
| <input type="checkbox"/> | <a href="#">Fusarium proliferatum strain PA3 internal transcribed spacer 1, partial sequence, 5.8S ribosomal RNA gene and internal transcribed spacer 2, complete sequence</a>                                | 688       | 688         | 100%        | 0.0     | 100%  | <a href="#">KJ701549.1</a> |
| <input type="checkbox"/> | <a href="#">Fusarium fulukuroi strain GF3 internal transcribed spacer 1, partial sequence, 5.8S ribosomal RNA gene and internal transcribed spacer 2, complete sequence</a>                                   | 688       | 688         | 100%        | 0.0     | 100%  | <a href="#">KJ605159.1</a> |
| <input type="checkbox"/> | <a href="#">Fusarium oxysporum strain OCT11 18S ribosomal RNA gene, partial sequence, internal transcribed spacer 1, 5.8S ribosomal RNA gene, and internal transcribed spacer 2, complete sequence</a>        | 688       | 688         | 100%        | 0.0     | 100%  | <a href="#">KJ605154.1</a> |
| <input type="checkbox"/> | <a href="#">Fusarium proliferatum isolate MPT-7 18S ribosomal RNA gene, partial sequence, internal transcribed spacer 1, 5.8S ribosomal RNA gene, and internal transcribed spacer 2, complete sequence</a>    | 688       | 688         | 100%        | 0.0     | 100%  | <a href="#">KJ634671.1</a> |
| <input type="checkbox"/> | <a href="#">Fusarium proliferatum strain 67 18S ribosomal RNA gene, partial sequence, internal transcribed spacer 1 and 5.8S ribosomal RNA gene, complete sequence</a>                                        | 688       | 688         | 100%        | 0.0     | 100%  | <a href="#">KJ608099.1</a> |
| <input type="checkbox"/> | <a href="#">Fusarium proliferatum strain 40 18S ribosomal RNA gene, partial sequence, internal transcribed spacer 1 and 5.8S ribosomal RNA gene, complete sequence</a>                                        | 688       | 688         | 100%        | 0.0     | 100%  | <a href="#">KJ608097.1</a> |
| <input type="checkbox"/> | <a href="#">Fusarium proliferatum strain 15 18S ribosomal RNA gene, partial sequence, internal transcribed spacer 1 and 5.8S ribosomal RNA gene, complete sequence</a>                                        | 688       | 688         | 100%        | 0.0     | 100%  | <a href="#">KJ608096.1</a> |
| <input type="checkbox"/> | <a href="#">Fusarium proliferatum strain 14 18S ribosomal RNA gene, partial sequence, internal transcribed spacer 1 and 5.8S ribosomal RNA gene, complete sequence</a>                                        | 688       | 688         | 100%        | 0.0     | 100%  | <a href="#">KJ608095.1</a> |
| <input type="checkbox"/> | <a href="#">Fusarium proliferatum strain 3 18S ribosomal RNA gene, partial sequence, internal transcribed spacer 1 and 5.8S ribosomal RNA gene, complete sequence</a>                                         | 688       | 688         | 100%        | 0.0     | 100%  | <a href="#">KJ608094.1</a> |
| <input type="checkbox"/> | <a href="#">Fusarium oxysporum isolate Fox56 18S ribosomal RNA gene, partial sequence, internal transcribed spacer 1, 5.8S ribosomal RNA gene, and internal transcribed spacer 2, complete sequence</a>       | 688       | 688         | 100%        | 0.0     | 100%  | <a href="#">KJ562373.1</a> |
| <input type="checkbox"/> | <a href="#">Gibberella sp. 1MJ-2014 internal transcribed spacer 1, partial sequence, 5.8S ribosomal RNA gene and internal transcribed spacer 2, complete sequence</a>                                         | 688       | 688         | 100%        | 0.0     | 100%  | <a href="#">KJ572177.1</a> |
| <input type="checkbox"/> | <a href="#">Fusarium proliferatum strain ZS07 internal transcribed spacer 1, partial sequence, 5.8S ribosomal RNA gene and internal transcribed spacer 2, complete sequence</a>                               | 688       | 688         | 100%        | 0.0     | 100%  | <a href="#">KJ490634.1</a> |
| <input type="checkbox"/> | <a href="#">Fusarium sp. BM8 18S ribosomal RNA gene and internal transcribed spacer 1, partial sequence, 5.8S ribosomal RNA gene and internal transcribed spacer 2, complete sequence</a>                     | 688       | 688         | 100%        | 0.0     | 100%  | <a href="#">KJ567463.1</a> |

## 16. ODL2

### Descriptions

#### Sequences producing significant alignments:

Select: [All](#) [None](#) Selected: 0

Alignments [Download](#) [GenBank](#) [Graphics](#) [Distance tree of results](#)

|                          | Description                                                                                                                                                                                                           | Max score | Total score | Query cover | E value | Ident | Accession                  |
|--------------------------|-----------------------------------------------------------------------------------------------------------------------------------------------------------------------------------------------------------------------|-----------|-------------|-------------|---------|-------|----------------------------|
| <input type="checkbox"/> | <a href="#">Ascomycota sp. AR-2010 isolate ATT242 18S ribosomal RNA gene, partial sequence, internal transcribed spacer 1, 5.8S ribosomal RNA gene, and internal transcribed spacer 2, complete sequence</a>          | 953       | 953         | 100%        | 0.0     | 100%  | <a href="#">HQ607907.1</a> |
| <input type="checkbox"/> | <a href="#">Fungal sp. Da1 18S ribosomal RNA gene, partial sequence, internal transcribed spacer 1, 5.8S ribosomal RNA gene, and internal transcribed spacer 2, complete sequence</a>                                 | 953       | 953         | 100%        | 0.0     | 100%  | <a href="#">HM991177.1</a> |
| <input type="checkbox"/> | <a href="#">Mycopleotodiscus indicus strain UAMH 8520 18S ribosomal RNA gene, partial sequence, internal transcribed spacer region 1 and 5.8S ribosomal RNA gene, complete sequence</a>                               | 953       | 953         | 100%        | 0.0     | 100%  | <a href="#">GU980696.1</a> |
| <input type="checkbox"/> | <a href="#">Mycopleotodiscus indicus strain UAMH 8516 18S ribosomal RNA gene, partial sequence, internal transcribed spacer 1 and 5.8S ribosomal RNA gene, complete sequence</a>                                      | 953       | 953         | 100%        | 0.0     | 100%  | <a href="#">GU980694.1</a> |
| <input type="checkbox"/> | <a href="#">Fungal endophyte sp. ZY-2009 isolate B-W3-1 18S ribosomal RNA gene, partial sequence, internal transcribed spacer 1, 5.8S ribosomal RNA gene, and internal transcribed spacer 2, complete sequence</a>    | 953       | 953         | 100%        | 0.0     | 100%  | <a href="#">FJ613801.1</a> |
| <input type="checkbox"/> | <a href="#">Mycopleotodiscus indicus strain UAMH 10746 18S ribosomal RNA gene, partial sequence, internal transcribed spacer 1, 5.8S ribosomal RNA gene, and internal transcribed spacer 2, complete sequence</a>     | 948       | 948         | 100%        | 0.0     | 99%   | <a href="#">GU980698.1</a> |
| <input type="checkbox"/> | <a href="#">Mycopleotodiscus indicus strain UTHSCSA R-4334 18S ribosomal RNA gene, partial sequence, internal transcribed spacer 1, 5.8S ribosomal RNA gene, and internal transcribed spacer 2, complete sequence</a> | 948       | 948         | 100%        | 0.0     | 99%   | <a href="#">GU220382.1</a> |
| <input type="checkbox"/> | <a href="#">Dothideomycetes sp. genotype 187 isolate FL0011 internal transcribed spacer 1, partial sequence, 5.8S ribosomal RNA gene and internal transcribed spacer 2, complete sequence</a>                         | 944       | 944         | 100%        | 0.0     | 99%   | <a href="#">JQ759887.1</a> |
| <input type="checkbox"/> | <a href="#">Dothideomycetes sp. genotype 187 isolate FL0010 internal transcribed spacer 1, partial sequence, 5.8S ribosomal RNA gene and internal transcribed spacer 2, complete sequence</a>                         | 944       | 944         | 100%        | 0.0     | 99%   | <a href="#">JQ759886.1</a> |
| <input type="checkbox"/> | <a href="#">Dothideomycetes sp. genotype 187 isolate FL0003 internal transcribed spacer 1, partial sequence, 5.8S ribosomal RNA gene and internal transcribed spacer 2, complete sequence</a>                         | 944       | 944         | 100%        | 0.0     | 99%   | <a href="#">JQ759880.1</a> |
| <input type="checkbox"/> | <a href="#">Dothideomycetes sp. genotype 187 isolate FL0002 internal transcribed spacer 1, partial sequence, 5.8S ribosomal RNA gene and internal transcribed spacer 2, complete sequence</a>                         | 944       | 944         | 100%        | 0.0     | 99%   | <a href="#">JQ759879.1</a> |
| <input type="checkbox"/> | <a href="#">Dothideomycetes sp. genotype 187 isolate FL0001 internal transcribed spacer 1, partial sequence, 5.8S ribosomal RNA gene and internal transcribed spacer 2, complete sequence</a>                         | 944       | 944         | 100%        | 0.0     | 99%   | <a href="#">JQ759878.1</a> |
| <input type="checkbox"/> | <a href="#">Uncultured Mycopleotodiscus clone C163017 18S ribosomal RNA gene, partial sequence, internal transcribed spacer 1, 5.8S ribosomal RNA gene, and internal transcribed spacer 2, complete sequence</a>      | 937       | 937         | 100%        | 0.0     | 99%   | <a href="#">KF718237.1</a> |
| <input type="checkbox"/> | <a href="#">Dothideomycetes sp. genotype 189 isolate FL0014 internal transcribed spacer 1, partial sequence, 5.8S ribosomal RNA gene and internal transcribed spacer 2, complete sequence</a>                         | 937       | 937         | 100%        | 0.0     | 99%   | <a href="#">JQ759890.1</a> |
| <input type="checkbox"/> | <a href="#">Dothideomycetes sp. genotype 189 isolate FL0017 internal transcribed spacer 1, partial sequence, 5.8S ribosomal RNA gene and internal transcribed spacer 2, complete sequence</a>                         | 931       | 931         | 100%        | 0.0     | 99%   | <a href="#">JQ759893.1</a> |



## 17. ODL3

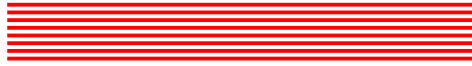

### Descriptions

#### Sequences producing significant alignments:

Select: [All](#) [None](#) Selected: 0

[Alignments](#) [Download](#) [GenBank](#) [Graphics](#) [Distance tree of results](#)

| Description                                                                                                                                                                                                                                    | Max score | Total score | Query cover | E value | Ident | Accession  |
|------------------------------------------------------------------------------------------------------------------------------------------------------------------------------------------------------------------------------------------------|-----------|-------------|-------------|---------|-------|------------|
| <input type="checkbox"/> Colletotrichum sp. CRPL1 mitochondrial genomic DNA containing 16S-23S intergenic spacer region, isolate CRPL1                                                                                                         | 821       | 821         | 98%         | 0.0     | 99%   | HG938385.1 |
| <input type="checkbox"/> Colletotrichum gloeosporioides 18S ribosomal RNA gene, partial sequence, internal transcribed spacer 1, 5.8S ribosomal RNA gene, and internal transcribed spacer 2, complete sequence, isolate MT02                   | 821       | 821         | 98%         | 0.0     | 99%   | JX161648.1 |
| <input type="checkbox"/> Colletotrichum sp. MT02 genomic DNA containing 18S rRNA gene, ITS1, 5.8S rRNA gene, ITS2 and 28S rRNA gene, isolate MT02                                                                                              | 821       | 821         | 98%         | 0.0     | 99%   | HE863947.1 |
| <input type="checkbox"/> Colletotrichum sp. C8 internal transcribed spacer 1, partial sequence, 5.8S ribosomal RNA gene and internal transcribed spacer 2, complete sequence, and 28S rRNA gene, isolate MT02                                  | 821       | 821         | 98%         | 0.0     | 99%   | KJ584655.1 |
| <input type="checkbox"/> Colletotrichum sp. C7 internal transcribed spacer 1, partial sequence, 5.8S ribosomal RNA gene and internal transcribed spacer 2, complete sequence, and 28S rRNA gene, isolate MT02                                  | 821       | 821         | 98%         | 0.0     | 99%   | KJ584654.1 |
| <input type="checkbox"/> Colletotrichum aenioma strain AASBS.105 internal transcribed spacer 1, partial sequence, 5.8S ribosomal RNA gene and internal transcribed spacer 2, complete sequence, and 28S rRNA gene, isolate MT02                | 821       | 821         | 98%         | 0.0     | 99%   | KF841607.1 |
| <input type="checkbox"/> Colletotrichum aenioma strain AASBS.102 internal transcribed spacer 1, partial sequence, 5.8S ribosomal RNA gene and internal transcribed spacer 2, complete sequence, and 28S rRNA gene, isolate MT02                | 821       | 821         | 98%         | 0.0     | 99%   | KF841605.1 |
| <input type="checkbox"/> Colletotrichum aenioma strain AASBS.103 internal transcribed spacer 1, partial sequence, 5.8S ribosomal RNA gene and internal transcribed spacer 2, complete sequence, and 28S rRNA gene, isolate MT02                | 821       | 821         | 98%         | 0.0     | 99%   | KF841604.1 |
| <input type="checkbox"/> Colletotrichum asianum isolate CMM3804 small subunit ribosomal RNA gene, partial sequence, internal transcribed spacer 1, 5.8S ribosomal RNA gene, and internal transcribed spacer 2, complete sequence, isolate MT02 | 821       | 821         | 98%         | 0.0     | 99%   | KC702991.1 |
| <input type="checkbox"/> Colletotrichum asianum isolate CMM3733 small subunit ribosomal RNA gene, partial sequence, internal transcribed spacer 1, 5.8S ribosomal RNA gene, and internal transcribed spacer 2, complete sequence, isolate MT02 | 821       | 821         | 98%         | 0.0     | 99%   | KC702987.1 |
| <input type="checkbox"/> Colletotrichum asianum isolate CMM3747 small subunit ribosomal RNA gene, partial sequence, internal transcribed spacer 1, 5.8S ribosomal RNA gene, and internal transcribed spacer 2, complete sequence, isolate MT02 | 821       | 821         | 98%         | 0.0     | 99%   | KC702982.1 |
| <input type="checkbox"/> Colletotrichum asianum isolate CMM3738 small subunit ribosomal RNA gene, partial sequence, internal transcribed spacer 1, 5.8S ribosomal RNA gene, and internal transcribed spacer 2, complete sequence, isolate MT02 | 821       | 821         | 98%         | 0.0     | 99%   | KC702977.1 |
| <input type="checkbox"/> Colletotrichum asianum isolate CMM3700 small subunit ribosomal RNA gene, partial sequence, internal transcribed spacer 1, 5.8S ribosomal RNA gene, and internal transcribed spacer 2, complete sequence, isolate MT02 | 821       | 821         | 98%         | 0.0     | 99%   | KC702983.1 |

## 18. ODL4

### Descriptions

#### Sequences producing significant alignments:

Select: [All](#) [None](#) Selected: 0

[Alignments](#) [Download](#) [GenBank](#) [Graphics](#) [Distance tree of results](#)

| Description                                                                                                                                                                                                                  | Max score | Total score | Query cover | E value | Ident | Accession  |
|------------------------------------------------------------------------------------------------------------------------------------------------------------------------------------------------------------------------------|-----------|-------------|-------------|---------|-------|------------|
| <input type="checkbox"/> Ascomycota sp. LM442 18S ribosomal RNA gene, partial sequence                                                                                                                                       | 872       | 872         | 99%         | 0.0     | 99%   | EF060747.1 |
| <input type="checkbox"/> Didymella sp. MA38 18S ribosomal RNA gene, partial sequence, internal transcribed spacer 1, 5.8S ribosomal RNA gene, and internal transcribed spacer 2, complete sequence, isolate MT02             | 848       | 848         | 96%         | 0.0     | 99%   | HM012812.1 |
| <input type="checkbox"/> Phoma sp. UASWS0884 internal transcribed spacer 1, partial sequence, 5.8S ribosomal RNA gene and internal transcribed spacer 2, complete sequence, and 28S rRNA gene, isolate MT02                  | 846       | 846         | 100%        | 0.0     | 99%   | KF525844.1 |
| <input type="checkbox"/> Phoma tropica strain M4639 18S ribosomal RNA gene, partial sequence, internal transcribed spacer 1, 5.8S ribosomal RNA gene, and internal transcribed spacer 2, complete sequence, isolate MT02     | 845       | 845         | 99%         | 0.0     | 99%   | JF923817.1 |
| <input type="checkbox"/> Didymella sp. ATT063 18S ribosomal RNA gene, partial sequence, internal transcribed spacer 1, 5.8S ribosomal RNA gene, and internal transcribed spacer 2, complete sequence, isolate MT02           | 845       | 845         | 99%         | 0.0     | 99%   | HQ087826.1 |
| <input type="checkbox"/> Pleosporales sp. E-000535869 18S ribosomal RNA gene, partial sequence, internal transcribed spacer 1, 5.8S ribosomal RNA gene, and internal transcribed spacer 2, complete sequence, isolate MT02   | 843       | 843         | 99%         | 0.0     | 99%   | JN578637.1 |
| <input type="checkbox"/> Didymellaceae sp. PGP8 internal transcribed spacer 1, partial sequence, 5.8S ribosomal RNA gene and internal transcribed spacer 2, complete sequence, and 28S rRNA gene, isolate MT02               | 841       | 841         | 100%        | 0.0     | 98%   | JX243825.1 |
| <input type="checkbox"/> Staagonosporopsis cucurbitacearum genes for 18S rRNA, ITS1, 5.8S rRNA, ITS2, 28S rRNA, complete and partial sequence, isolate: SE7                                                                  | 841       | 841         | 100%        | 0.0     | 98%   | AB714986.1 |
| <input type="checkbox"/> Staagonosporopsis cucurbitacearum genes for 18S rRNA, ITS1, 5.8S rRNA, ITS2, 28S rRNA, complete and partial sequence, isolate: SE5                                                                  | 841       | 841         | 100%        | 0.0     | 98%   | AB714984.1 |
| <input type="checkbox"/> Staagonosporopsis cucurbitacearum isolate OTU450 internal transcribed spacer 1, partial sequence, 5.8S ribosomal RNA gene and internal transcribed spacer 2, complete sequence, isolate MT02        | 841       | 841         | 100%        | 0.0     | 98%   | GU934518.1 |
| <input type="checkbox"/> Didymella bronniae strain MA71 18S ribosomal RNA gene, partial sequence, internal transcribed spacer 1, 5.8S ribosomal RNA gene, and internal transcribed spacer 2, complete sequence, isolate MT02 | 841       | 841         | 100%        | 0.0     | 98%   | GU592001.1 |
| <input type="checkbox"/> Staagonosporopsis cucurbitacearum genes for 18S rRNA, ITS1, 5.8S rRNA, ITS2, 28S rRNA, complete and partial sequence, isolate: SE6                                                                  | 839       | 839         | 99%         | 0.0     | 98%   | AB714985.1 |
| <input type="checkbox"/> Uncultured fungus genomic DNA sequence containing 18S rRNA gene, ITS1, 5.8S rRNA gene, ITS2 and 28S rRNA gene, clone F12_P_4_D7                                                                     | 839       | 839         | 99%         | 0.0     | 98%   | FN397422.1 |
| <input type="checkbox"/> Ascomycete sp. HKC7 18S ribosomal RNA gene, partial sequence, internal transcribed spacer 1, 5.8S ribosomal RNA gene, and internal transcribed spacer 2, complete sequence, isolate MT02            | 839       | 839         | 99%         | 0.0     | 98%   | EF029826.1 |
| <input type="checkbox"/> Fungal endophyte MS2 IS83 18S ribosomal RNA gene, partial sequence, internal transcribed spacer 1, 5.8S ribosomal RNA gene and internal transcribed spacer 2, complete sequence, isolate MT02       | 839       | 839         | 96%         | 0.0     | 99%   | AF413038.1 |
| <input type="checkbox"/> Fungal endophyte MS2 IS37 18S ribosomal RNA gene, partial sequence, internal transcribed spacer 1, 5.8S ribosomal RNA gene and internal transcribed spacer 2, complete sequence, isolate MT02       | 839       | 839         | 96%         | 0.0     | 99%   | AF413036.1 |
| <input type="checkbox"/> Phoma sp. CY107 18S ribosomal RNA gene, partial sequence, internal transcribed spacer 1, 5.8S ribosomal RNA gene, and internal transcribed spacer 2, complete sequence, isolate MT02                | 837       | 837         | 100%        | 0.0     | 98%   | HQ607960.1 |

## 19. ODL5

### Descriptions

#### Sequences producing significant alignments:

Select: [All](#) [None](#) Selected: 0

[Alignments](#) [Download](#) [GenBank](#) [Graphics](#) [Distance tree of results](#)

| Description                                                                                                                                                                                       | Max score | Total score | Query cover | E value | Ident | Accession                  |
|---------------------------------------------------------------------------------------------------------------------------------------------------------------------------------------------------|-----------|-------------|-------------|---------|-------|----------------------------|
| <input type="checkbox"/> <a href="#">Colletotrichum sp. CRPL1 mitochondrial genomic DNA containing 16S-23S intergenic spacer region, isolate CRPL1</a>                                            | 811       | 811         | 95%         | 0.0     | 99%   | <a href="#">HG938365.1</a> |
| <input type="checkbox"/> <a href="#">Colletotrichum oloosporioides strain CG60 18S ribosomal RNA gene, partial sequence; internal transcribed spacer 1, 5.8S ribosomal RNA gene, and intern</a>   | 811       | 811         | 95%         | 0.0     | 99%   | <a href="#">KJ632430.1</a> |
| <input type="checkbox"/> <a href="#">Colletotrichum oloosporioides strain CG14 18S ribosomal RNA gene, partial sequence; internal transcribed spacer 1, 5.8S ribosomal RNA gene, and intern</a>   | 811       | 811         | 95%         | 0.0     | 99%   | <a href="#">KJ632428.1</a> |
| <input type="checkbox"/> <a href="#">Colletotrichum oloosporioides strain CG40 18S ribosomal RNA gene, partial sequence; internal transcribed spacer 1, 5.8S ribosomal RNA gene, and intern</a>   | 811       | 811         | 95%         | 0.0     | 99%   | <a href="#">KJ632415.1</a> |
| <input type="checkbox"/> <a href="#">Colletotrichum oloosporioides strain CG04 18S ribosomal RNA gene, partial sequence; internal transcribed spacer 1, 5.8S ribosomal RNA gene, and intern</a>   | 811       | 811         | 95%         | 0.0     | 99%   | <a href="#">KJ632405.1</a> |
| <input type="checkbox"/> <a href="#">Colletotrichum oloosporioides strain CG20 18S ribosomal RNA gene, partial sequence; internal transcribed spacer 1, 5.8S ribosomal RNA gene, and intern</a>   | 811       | 811         | 95%         | 0.0     | 99%   | <a href="#">KJ632402.1</a> |
| <input type="checkbox"/> <a href="#">Colletotrichum oloosporioides strain CG03 18S ribosomal RNA gene, partial sequence; internal transcribed spacer 1, 5.8S ribosomal RNA gene, and intern</a>   | 811       | 811         | 95%         | 0.0     | 99%   | <a href="#">KJ632401.1</a> |
| <input type="checkbox"/> <a href="#">Colletotrichum oloosporioides strain NF68 18S ribosomal RNA gene, partial sequence; internal transcribed spacer 1, 5.8S ribosomal RNA gene, and intern</a>   | 811       | 811         | 95%         | 0.0     | 99%   | <a href="#">KJ588251.1</a> |
| <input type="checkbox"/> <a href="#">Colletotrichum oloosporioides strain NF52 18S ribosomal RNA gene, partial sequence; internal transcribed spacer 1, 5.8S ribosomal RNA gene, and intern</a>   | 811       | 811         | 95%         | 0.0     | 99%   | <a href="#">KJ588250.1</a> |
| <input type="checkbox"/> <a href="#">Colletotrichum oloosporioides strain NF31 18S ribosomal RNA gene, partial sequence; internal transcribed spacer 1, 5.8S ribosomal RNA gene, and intern</a>   | 811       | 811         | 95%         | 0.0     | 99%   | <a href="#">KJ588249.1</a> |
| <input type="checkbox"/> <a href="#">Colletotrichum oloosporioides strain NF25 18S ribosomal RNA gene, partial sequence; internal transcribed spacer 1, 5.8S ribosomal RNA gene, and intern</a>   | 811       | 811         | 95%         | 0.0     | 99%   | <a href="#">KJ588248.1</a> |
| <input type="checkbox"/> <a href="#">Colletotrichum oloosporioides strain NF21 18S ribosomal RNA gene, partial sequence; internal transcribed spacer 1, 5.8S ribosomal RNA gene, and intern</a>   | 811       | 811         | 95%         | 0.0     | 99%   | <a href="#">KJ588247.1</a> |
| <input type="checkbox"/> <a href="#">Colletotrichum sp. 2 MJ-2014 internal transcribed spacer 1, partial sequence; 5.8S ribosomal RNA gene and internal transcribed spacer 2, complete sequen</a> | 811       | 811         | 95%         | 0.0     | 99%   | <a href="#">KJ572160.1</a> |
| <input type="checkbox"/> <a href="#">Colletotrichum sp. GM151 18S ribosomal RNA gene, partial sequence; internal transcribed spacer 1, 5.8S ribosomal RNA gene, and internal transcribed spa</a>  | 811       | 811         | 95%         | 0.0     | 99%   | <a href="#">KF214634.1</a> |
| <input type="checkbox"/> <a href="#">Colletotrichum sp. GM149 18S ribosomal RNA gene, partial sequence; internal transcribed spacer 1, 5.8S ribosomal RNA gene, and internal transcribed spa</a>  | 811       | 811         | 95%         | 0.0     | 99%   | <a href="#">KF214633.1</a> |

## 20. CCL1

### Descriptions

#### Sequences producing significant alignments:

Select: [All](#) [None](#) Selected: 0

[Alignments](#) [Download](#) [GenBank](#) [Graphics](#) [Distance tree of results](#)

| Description                                                                                                                                                                                       | Max score | Total score | Query cover | E value | Ident | Accession                  |
|---------------------------------------------------------------------------------------------------------------------------------------------------------------------------------------------------|-----------|-------------|-------------|---------|-------|----------------------------|
| <input type="checkbox"/> <a href="#">Dothideomyces sp. P15E6 18S ribosomal RNA gene, partial sequence; internal transcribed spacer 1, 5.8S ribosomal RNA gene, and internal transcribed s</a>     | 808       | 808         | 100%        | 0.0     | 98%   | <a href="#">JN207291.1</a> |
| <input type="checkbox"/> <a href="#">Dothideomyces sp. P15E2 18S ribosomal RNA gene, partial sequence; internal transcribed spacer 1, 5.8S ribosomal RNA gene, and internal transcribed s</a>     | 791       | 791         | 97%         | 0.0     | 98%   | <a href="#">JN207287.1</a> |
| <input type="checkbox"/> <a href="#">Dothideomyces sp. P9E3 18S ribosomal RNA gene, partial sequence; internal transcribed spacer 1, 5.8S ribosomal RNA gene, and internal transcribed sp</a>     | 789       | 789         | 97%         | 0.0     | 98%   | <a href="#">JN207264.1</a> |
| <input type="checkbox"/> <a href="#">Dothideomyces sp. P15E5 18S ribosomal RNA gene, partial sequence; internal transcribed spacer 1, 5.8S ribosomal RNA gene, and internal transcribed s</a>     | 787       | 787         | 96%         | 0.0     | 98%   | <a href="#">JN207290.1</a> |
| <input type="checkbox"/> <a href="#">Dothideomyces sp. 7696 18S ribosomal RNA gene, partial sequence; internal transcribed spacer 1, 5.8S ribosomal RNA gene, and internal transcribed spa</a>    | 778       | 778         | 100%        | 0.0     | 97%   | <a href="#">EU680549.1</a> |
| <input type="checkbox"/> <a href="#">Epicoccum sorghi isolate NLF01 18S ribosomal RNA gene, partial sequence; internal transcribed spacer 1, 5.8S ribosomal RNA gene, and internal transcrib</a>  | 776       | 776         | 99%         | 0.0     | 97%   | <a href="#">KC106688.1</a> |
| <input type="checkbox"/> <a href="#">Epicoccum sorghi isolate NLF08 18S ribosomal RNA gene, partial sequence; internal transcribed spacer 1, 5.8S ribosomal RNA gene, and internal transcrib</a>  | 776       | 776         | 99%         | 0.0     | 97%   | <a href="#">KC106689.1</a> |
| <input type="checkbox"/> <a href="#">Dothideomyces sp. 7687 18S ribosomal RNA gene, partial sequence; internal transcribed spacer 1, 5.8S ribosomal RNA gene, and internal transcribed spa</a>    | 776       | 776         | 99%         | 0.0     | 97%   | <a href="#">EU680531.1</a> |
| <input type="checkbox"/> <a href="#">Uncultured Dothideomyces clone F6 18S ribosomal RNA gene, partial sequence; internal transcribed spacer 1, 5.8S ribosomal RNA gene, and internal tra</a>     | 776       | 776         | 99%         | 0.0     | 97%   | <a href="#">EU680489.1</a> |
| <input type="checkbox"/> <a href="#">Ascomycete sp. RM6-1 18S ribosomal RNA gene, partial sequence; internal transcribed spacer 1, 5.8S ribosomal RNA gene, and internal transcribed spacer</a>   | 776       | 776         | 99%         | 0.0     | 97%   | <a href="#">DQ993634.1</a> |
| <input type="checkbox"/> <a href="#">Phoma sp. KGM01 internal transcribed spacer 1, partial sequence; 5.8S ribosomal RNA gene and internal transcribed spacer 2, complete sequence; and 28</a>    | 773       | 773         | 100%        | 0.0     | 96%   | <a href="#">KF675768.1</a> |
| <input type="checkbox"/> <a href="#">Leptosphaeria sacchari isolate NRRL 54808 internal transcribed spacer 1, partial sequence; 5.8S ribosomal RNA gene and internal transcribed spacer 2, co</a> | 773       | 773         | 100%        | 0.0     | 96%   | <a href="#">KF512823.1</a> |
| <input type="checkbox"/> <a href="#">Dothideomyces sp. genotype 527 isolate NC0343 internal transcribed spacer 1, partial sequence; 5.8S ribosomal RNA gene and internal transcribed spac</a>     | 773       | 773         | 100%        | 0.0     | 96%   | <a href="#">JQ781375.1</a> |
| <input type="checkbox"/> <a href="#">Phoma sp. 3 TMS-2011 voucher SC14d1p16-14 18S ribosomal RNA gene, partial sequence; internal transcribed spacer 1, 5.8S ribosomal RNA gene, and in</a>       | 773       | 773         | 100%        | 0.0     | 96%   | <a href="#">HQ631000.1</a> |

## 21. CCL2

### Descriptions

#### Sequences producing significant alignments:

Select: [All](#) [None](#) Selected: 0

[Alignments](#) [Download](#) [GenBank](#) [Graphics](#) [Distance tree of results](#)

|                          | Description                                                                                                                                                                                                   | Max score | Total score | Query cover | E value | Ident | Accession                  |
|--------------------------|---------------------------------------------------------------------------------------------------------------------------------------------------------------------------------------------------------------|-----------|-------------|-------------|---------|-------|----------------------------|
| <input type="checkbox"/> | <a href="#">Fusarium sp. Fs025TNW-T 18S ribosomal RNA gene, partial sequence; internal transcribed spacer 1, 5.8S ribosomal RNA gene, and internal transcribed spacer 2, complete sequence</a>                | 708       | 708         | 92%         | 0.0     | 98%   | <a href="#">KF293357.1</a> |
| <input type="checkbox"/> | <a href="#">Fusarium sp. Fs020TNPB1-TR 18S ribosomal RNA gene, partial sequence; internal transcribed spacer 1, 5.8S ribosomal RNA gene, and internal transcribed spacer 2, complete sequence</a>             | 708       | 708         | 92%         | 0.0     | 98%   | <a href="#">KF293339.1</a> |
| <input type="checkbox"/> | <a href="#">Fusarium sp. FsCP21HRW-T internal transcribed spacer 1, partial sequence; 5.8S ribosomal RNA gene and internal transcribed spacer 2, complete sequence</a>                                        | 708       | 708         | 92%         | 0.0     | 98%   | <a href="#">KF293320.1</a> |
| <input type="checkbox"/> | <a href="#">Fusarium verticillioides strain CM12m2 18S ribosomal RNA gene, partial sequence; internal transcribed spacer 1, 5.8S ribosomal RNA gene, and internal transcribed spacer 2, complete sequence</a> | 708       | 708         | 92%         | 0.0     | 98%   | <a href="#">KJ188668.1</a> |
| <input type="checkbox"/> | <a href="#">Fusarium proliferatum strain PA3 internal transcribed spacer 1, partial sequence; 5.8S ribosomal RNA gene and internal transcribed spacer 2, complete sequence</a>                                | 708       | 708         | 92%         | 0.0     | 98%   | <a href="#">KJ701549.1</a> |
| <input type="checkbox"/> | <a href="#">Fusarium fujikuroi strain GF3 internal transcribed spacer 1, partial sequence; 5.8S ribosomal RNA gene and internal transcribed spacer 2, complete sequence</a>                                   | 708       | 708         | 92%         | 0.0     | 98%   | <a href="#">KJ605159.1</a> |
| <input type="checkbox"/> | <a href="#">Fusarium oxysporum strain OCT11 18S ribosomal RNA gene, partial sequence; internal transcribed spacer 1, 5.8S ribosomal RNA gene, and internal transcribed spacer 2, complete sequence</a>        | 708       | 708         | 92%         | 0.0     | 98%   | <a href="#">KJ605154.1</a> |
| <input type="checkbox"/> | <a href="#">Fusarium proliferatum isolate MPT-7 18S ribosomal RNA gene, partial sequence; internal transcribed spacer 1, 5.8S ribosomal RNA gene, and internal transcribed spacer 2, complete sequence</a>    | 708       | 708         | 92%         | 0.0     | 98%   | <a href="#">KJ634671.1</a> |
| <input type="checkbox"/> | <a href="#">Fusarium proliferatum strain 67 18S ribosomal RNA gene, partial sequence; internal transcribed spacer 1 and 5.8S ribosomal RNA gene, complete sequence</a>                                        | 708       | 708         | 92%         | 0.0     | 98%   | <a href="#">KJ608098.1</a> |
| <input type="checkbox"/> | <a href="#">Fusarium proliferatum strain 40 18S ribosomal RNA gene, partial sequence; internal transcribed spacer 1 and 5.8S ribosomal RNA gene, complete sequence</a>                                        | 708       | 708         | 92%         | 0.0     | 98%   | <a href="#">KJ608097.1</a> |
| <input type="checkbox"/> | <a href="#">Fusarium proliferatum strain 15 18S ribosomal RNA gene, partial sequence; internal transcribed spacer 1 and 5.8S ribosomal RNA gene, complete sequence</a>                                        | 708       | 708         | 92%         | 0.0     | 98%   | <a href="#">KJ608096.1</a> |
| <input type="checkbox"/> | <a href="#">Fusarium proliferatum strain 14 18S ribosomal RNA gene, partial sequence; internal transcribed spacer 1 and 5.8S ribosomal RNA gene, complete sequence</a>                                        | 708       | 708         | 92%         | 0.0     | 98%   | <a href="#">KJ608095.1</a> |
| <input type="checkbox"/> | <a href="#">Fusarium proliferatum strain 3 18S ribosomal RNA gene, partial sequence; internal transcribed spacer 1 and 5.8S ribosomal RNA gene, complete sequence</a>                                         | 708       | 708         | 92%         | 0.0     | 98%   | <a href="#">KJ608094.1</a> |
| <input type="checkbox"/> | <a href="#">Fusarium oxysporum isolate Fox56 18S ribosomal RNA gene, partial sequence; internal transcribed spacer 1, 5.8S ribosomal RNA gene, and internal transcribed spacer 2, complete sequence</a>       | 708       | 708         | 92%         | 0.0     | 98%   | <a href="#">KJ562373.1</a> |

## 22. CCL3

### Descriptions

#### Sequences producing significant alignments:

Select: [All](#) [None](#) Selected: 0

[Alignments](#) [Download](#) [GenBank](#) [Graphics](#) [Distance tree of results](#)

|                          | Description                                                                                                                                                                                                                                            | Max score | Total score | Query cover | E value | Ident | Accession                  |
|--------------------------|--------------------------------------------------------------------------------------------------------------------------------------------------------------------------------------------------------------------------------------------------------|-----------|-------------|-------------|---------|-------|----------------------------|
| <input type="checkbox"/> | <a href="#">Phoma gardeniae isolate UM 298 18S ribosomal RNA gene, partial sequence; internal transcribed spacer 1, 5.8S ribosomal RNA gene, and internal transcribed spacer 2, complete sequence</a>                                                  | 763       | 763         | 100%        | 0.0     | 99%   | <a href="#">JX966638.1</a> |
| <input type="checkbox"/> | <a href="#">Phoma sp. 77GP/S 18S ribosomal RNA gene, partial sequence; internal transcribed spacer 1, 5.8S ribosomal RNA gene, and internal transcribed spacer 2, complete sequence</a>                                                                | 758       | 849         | 100%        | 0.0     | 99%   | <a href="#">GQ352490.1</a> |
| <input type="checkbox"/> | <a href="#">Phoma macrostoma strain IMI 336761 18S ribosomal RNA gene, partial sequence; internal transcribed spacer 1, 5.8S ribosomal RNA gene, and internal transcribed spacer 2, complete sequence</a>                                              | 756       | 756         | 99%         | 0.0     | 99%   | <a href="#">DQ474112.1</a> |
| <input type="checkbox"/> | <a href="#">Phoma sp. KH00184 18S ribosomal RNA gene, partial sequence; internal transcribed spacer 1 and 5.8S ribosomal RNA gene, complete sequence; and internal transcribed spacer 2, complete sequence</a>                                         | 754       | 754         | 100%        | 0.0     | 98%   | <a href="#">GU017487.1</a> |
| <input type="checkbox"/> | <a href="#">Phoma sp. CASMB-SEF 45 18S ribosomal RNA gene, partial sequence; internal transcribed spacer 1, 5.8S ribosomal RNA gene, and internal transcribed spacer 2, complete sequence</a>                                                          | 752       | 844         | 100%        | 0.0     | 98%   | <a href="#">JX006063.1</a> |
| <input type="checkbox"/> | <a href="#">Phoma gardeniae isolate UM 228 18S ribosomal RNA gene, partial sequence; internal transcribed spacer 1, 5.8S ribosomal RNA gene, and internal transcribed spacer 2, complete sequence</a>                                                  | 749       | 749         | 100%        | 0.0     | 98%   | <a href="#">JX966640.1</a> |
| <input type="checkbox"/> | <a href="#">Phoma gardeniae strain CBS 626.68 18S ribosomal RNA gene, partial sequence; internal transcribed spacer 1, 5.8S ribosomal RNA gene, and internal transcribed spacer 2, complete sequence; and 28S ribosomal RNA gene, partial sequence</a> | 749       | 749         | 100%        | 0.0     | 96%   | <a href="#">F442706.1</a>  |
| <input type="checkbox"/> | <a href="#">Phoma gardeniae strain CBS 302.79 18S ribosomal RNA gene, partial sequence; internal transcribed spacer 1, 5.8S ribosomal RNA gene, and internal transcribed spacer 2, complete sequence; and 28S ribosomal RNA gene, partial sequence</a> | 749       | 749         | 100%        | 0.0     | 96%   | <a href="#">F442706.1</a>  |
| <input type="checkbox"/> | <a href="#">Phoma sp. E14029b internal transcribed spacer 1, partial sequence; 5.8S ribosomal RNA gene and internal transcribed spacer 2, complete sequence; and 28S ribosomal RNA gene, partial sequence</a>                                          | 745       | 745         | 100%        | 0.0     | 98%   | <a href="#">KF466245.1</a> |
| <input type="checkbox"/> | <a href="#">Phoma sp. JK93 18S ribosomal RNA, partial sequence; internal transcribed spacer 1, 5.8S ribosomal RNA, and internal transcribed spacer 2, complete sequence</a>                                                                            | 745       | 745         | 100%        | 0.0     | 98%   | <a href="#">JX624302.1</a> |
| <input type="checkbox"/> | <a href="#">Pleosporales sp. 1 MU-2012 genomic DNA containing ITS1, 5.8S rRNA gene, ITS2 and 28S rRNA gene, isolate CM47</a>                                                                                                                           | 745       | 745         | 100%        | 0.0     | 98%   | <a href="#">HE820773.1</a> |
| <input type="checkbox"/> | <a href="#">Phoma macrostoma strain IMI 192268 18S ribosomal RNA gene, partial sequence; internal transcribed spacer 1, 5.8S ribosomal RNA gene, and internal transcribed spacer 2, complete sequence</a>                                              | 745       | 745         | 100%        | 0.0     | 98%   | <a href="#">DQ474109.1</a> |
| <input type="checkbox"/> | <a href="#">Phoma macrostoma 18S ribosomal RNA gene, partial sequence; internal transcribed spacer 1, 5.8S ribosomal RNA gene, and internal transcribed spacer 2, complete sequence</a>                                                                | 745       | 745         | 100%        | 0.0     | 98%   | <a href="#">AF046020.2</a> |
| <input type="checkbox"/> | <a href="#">Uncultured fungus clone TSPF_23 18S ribosomal RNA gene, partial sequence; internal transcribed spacer 1, 5.8S ribosomal RNA gene, and internal transcribed spacer 2, complete sequence</a>                                                 | 745       | 745         | 100%        | 0.0     | 98%   | <a href="#">FJ213518.1</a> |
| <input type="checkbox"/> | <a href="#">Phoma gardeniae strain CBS 626.68 18S ribosomal RNA gene, partial sequence; internal transcribed spacer 1, 5.8S ribosomal RNA gene, and internal transcribed spacer 2, complete sequence; and 28S ribosomal RNA gene, partial sequence</a> | 745       | 745         | 100%        | 0.0     | 96%   | <a href="#">F442706.1</a>  |

## 23. MKS1

### Descriptions

#### Sequences producing significant alignments:

Select: [All](#) [None](#) Selected:0

[Alignments](#) [Download](#) [GenBank](#) [Graphics](#) [Distance tree of results](#)

|                          | Description                                                                                                                                                             | Max score | Total score | Query cover | E value | Ident | Accession                  |
|--------------------------|-------------------------------------------------------------------------------------------------------------------------------------------------------------------------|-----------|-------------|-------------|---------|-------|----------------------------|
| <input type="checkbox"/> | <a href="#">Fusarium oxysporum strain HPA2 18S ribosomal RNA gene, partial sequence, internal transcribed spacer 1, 5.8S ribosomal RNA gene, and internal transcri</a>  | 699       | 699         | 98%         | 0.0     | 99%   | <a href="#">KJ677253.1</a> |
| <input type="checkbox"/> | <a href="#">Fusarium oxysporum strain HPA1 18S ribosomal RNA gene, partial sequence, internal transcribed spacer 1, 5.8S ribosomal RNA gene, and internal transcri</a>  | 699       | 699         | 98%         | 0.0     | 99%   | <a href="#">KJ677252.1</a> |
| <input type="checkbox"/> | <a href="#">Fusarium oxysporum f. sp. cumini strain F11 18S ribosomal RNA gene, partial sequence, internal transcribed spacer 1, 5.8S ribosomal RNA gene, and inter</a> | 699       | 699         | 98%         | 0.0     | 99%   | <a href="#">KJ653447.1</a> |
| <input type="checkbox"/> | <a href="#">Fusarium oxysporum strain CF12 18S ribosomal RNA gene, partial sequence, internal transcribed spacer 1 and 5.8S ribosomal RNA gene, complete sequen</a>     | 699       | 699         | 98%         | 0.0     | 99%   | <a href="#">KJ620978.1</a> |
| <input type="checkbox"/> | <a href="#">Fusarium oxysporum isolate V23-40 18S ribosomal RNA gene, partial sequence</a>                                                                              | 699       | 699         | 98%         | 0.0     | 99%   | <a href="#">KJ439205.1</a> |
| <input type="checkbox"/> | <a href="#">Fusarium oxysporum isolate V21-269 18S ribosomal RNA gene, partial sequence</a>                                                                             | 699       | 699         | 98%         | 0.0     | 99%   | <a href="#">KJ439203.1</a> |
| <input type="checkbox"/> | <a href="#">Fusarium oxysporum isolate P82-154 18S ribosomal RNA gene, partial sequence</a>                                                                             | 699       | 699         | 98%         | 0.0     | 99%   | <a href="#">KJ439169.1</a> |
| <input type="checkbox"/> | <a href="#">Fusarium oxysporum isolate P61-11 18S ribosomal RNA gene, partial sequence</a>                                                                              | 699       | 699         | 98%         | 0.0     | 99%   | <a href="#">KJ439154.1</a> |
| <input type="checkbox"/> | <a href="#">Fusarium oxysporum isolate P52-588 18S ribosomal RNA gene, partial sequence</a>                                                                             | 699       | 699         | 98%         | 0.0     | 99%   | <a href="#">KJ439149.1</a> |
| <input type="checkbox"/> | <a href="#">Fusarium oxysporum isolate C43-198 18S ribosomal RNA gene, partial sequence</a>                                                                             | 699       | 699         | 98%         | 0.0     | 99%   | <a href="#">KJ439092.1</a> |
| <input type="checkbox"/> | <a href="#">Fusarium oxysporum isolate C34-294 18S ribosomal RNA gene, partial sequence</a>                                                                             | 699       | 699         | 98%         | 0.0     | 99%   | <a href="#">KJ439088.1</a> |
| <input type="checkbox"/> | <a href="#">Fusarium oxysporum strain 8 internal transcribed spacer 1, partial sequence, 5.8S ribosomal RNA gene, complete sequence, and internal transcribed space</a> | 699       | 699         | 98%         | 0.0     | 99%   | <a href="#">KJ160151.1</a> |
| <input type="checkbox"/> | <a href="#">Fusarium oxysporum strain 3 internal transcribed spacer 1, partial sequence, 5.8S ribosomal RNA gene, complete sequence, and internal transcribed space</a> | 699       | 699         | 98%         | 0.0     | 99%   | <a href="#">KJ160146.1</a> |
